1  
2  
3  
4  
5  
6  
7  
8  
9  
10  
11  
12  
13  
14  
15  
16  
17  
18  
19  
20  
21  
22  
23  
24  
25  
26  
27  
28  
29  
30  
31  
32

# Polymerization cycle of actin homolog MreB from a Gram-positive bacterium

Wei Mao<sup>1</sup>, Lars D. Renner<sup>2\*</sup>, Charlène Cornilleau<sup>1</sup>, Ines Li de la Sierra-Gallay<sup>3</sup>, Sarah Benlamara<sup>1</sup>,  
Yoan Ah-Seng<sup>1</sup>, Herman Van Tilbeurgh<sup>3</sup>, Sylvie Nessler<sup>3\*</sup>, Aurélie Bertin<sup>4\*</sup>, Arnaud Chastanet<sup>1\*</sup> and  
Rut Carballido-López<sup>1\*</sup>

## Affiliations

<sup>1</sup> MICALIS Institute, INRAE, AgroParisTech, Université Paris-Saclay, 78350 Jouy-en-Josas, France.

<sup>2</sup> Leibniz Institute of Polymer Research, and the Max-Bergmann-Center of Biomaterials, Dresden, Germany.

<sup>3</sup> Institute for Integrative Biology of the Cell (I2BC), Université Paris-Saclay, CEA, CNRS, 91198, Gif-sur-Yvette, France.

<sup>4</sup> Laboratoire Physico Chimie Curie, Institut Curie, PSL Research University, CNRS UMR168, 75005 Paris, France ; Sorbonne Université, Paris, 75005, France.

\* To whom correspondence should be addressed.

**Keywords:** MreB, actin, cytoskeleton, polymerization, filament, ATPase, lipid membrane, crystal structure, TEM, cryo-electron microscopy, QCMD.

**Running title.** Gram+ MreB polymerisation

## 33 **Abstract**

34 In most rod-shaped bacteria, the actin homologue MreB is an essential component of the protein  
35 complex effecting cell wall elongation. The polymerization cycle and filament properties of eukaryotic  
36 actin have studied for decades and are well characterized. However, purification and *in vitro* work on  
37 MreB proteins have proven very difficult. Current knowledge of MreB biochemical and polymerization  
38 properties remains limited and is based on MreB proteins from Gram-negative species. In this study,  
39 we report the first observation of organized filaments and the first 3D-structure of MreB from a Gram-  
40 positive bacterium. We have purified MreB from the thermophilic *Geobacillus stearothermophilus* and  
41 shown that it forms straight pairs of protofilaments *in vitro*, and that polymerization depends on the  
42 presence of both lipids and nucleotide triphosphate. Two spatially close short hydrophobic sequences  
43 mediate membrane anchoring. Importantly, we demonstrate that unlike eukaryotic actin, nucleotide  
44 hydrolysis is a prerequisite for MreB interaction with the membrane, and that binding to lipids then  
45 triggers polymerization. Based on our results, we propose a molecular model for the mechanism of  
46 MreB polymerization.

47

48

49

50

## 51 **Introduction**

52 Cytoskeletal proteins are known to polymerize into filaments that play critical roles in various aspects  
53 of cell physiology, including cell shape, mechanical strength and motion, cytokinesis, chromosome  
54 partitioning and intracellular transport. Prokaryotic cells contain homologs of the main eukaryotic  
55 cytoskeletal proteins, namely actin, tubulin and intermediate filaments (Cabeen & Jacobs-Wagner,  
56 2010; Lin & Thanbichler, 2013; Shaevitz & Gitai, 2010), which were identified decades after their  
57 eukaryotic counterparts. In 2001, MreB proteins of the Gram-positive (G+) model bacterium *Bacillus*  
58 *subtilis* were found to form actin-like filamentous structures underneath the cytoplasmic membrane  
59 and to play a key role in the determination and maintenance of rod-shape (Carballido-Lopez, 2017;  
60 Jones *et al*, 2001). Soon after, the three-dimensional structure of one of the two MreB isoforms from  
61 the Gram-negative (G-) thermophilic bacterium *Thermotoga maritima* (MreB<sup>Tm</sup>) was solved (van den  
62 Ent *et al*, 2001), confirming its structural homology with actin (Bork *et al*, 1992). Besides, MreB<sup>Tm</sup> in  
63 solution was shown to assemble into filaments similar to filamentous actin (F-actin) (van den Ent *et al*,  
64 2001).

65 Research in the field of eukaryotic actin historically focused on elucidating structure-function  
66 relationships from *in vitro* studies. The availability of large amounts of soluble actin purified from  
67 several cell types since the 1940s enabled decades of mechanistic studies on actin polymerization  
68 (Pollard, 2016). In contrast, functional MreB from mesophilic bacteria proved particularly difficult to  
69 purify thwarting efforts to work with it *in vitro*. Instead, research on MreB primarily focused on cellular  
70 studies, driven by the advent of fluorescent microscopy in bacterial cell biology. Over the past two  
71 decades, the subcellular localization and dynamics of MreB have been described in several G- and G+  
72 species (Billaudeau *et al*, 2017; Billaudeau *et al*, 2019; Dion *et al*, 2019; Harris *et al*, 2014; Hussain *et*  
73 *al*, 2018; Olshausen *et al*, 2013; Oswald *et al*, 2016; Ouzounov *et al*, 2016; Renner *et al*, 2013; Schirner  
74 *et al*, 2015). *In vivo*, MreB proteins form discrete membrane-associated polymeric assemblies along  
75 the cell cylinder that move processively around the rod circumference together with proteins of the  
76 cell wall (CW) elongation machinery (Domínguez-Escobar *et al*, 2011; Garner *et al*, 2011; van Teeffelen  
77 *et al*, 2011), forming the so-called Rod complex. The Rod complex motility is driven by CW synthesis  
78 (Domínguez-Escobar *et al.*, 2011; Garner *et al.*, 2011) and MreB assemblies self-align circumferentially,  
79 along their direction of motion (Billaudeau *et al.*, 2019; Hussain *et al.*, 2018). Recently, it was proposed  
80 that the specific intrinsic curvature of MreB polymers increases their affinity for the greatest concave  
81 (negative) membrane curvature within the cell (i.e. the inner surface of the rod circumference),  
82 accounting for their orientation (Hussain *et al.*, 2018). The current model is that self-aligned MreB  
83 filaments restrict the diffusion of CW biosynthetic proteins in the membrane and orient their motion  
84 to insert new peptidoglycan strands in radial hoops perpendicular to the long axis of the cell, promoting  
85 the cylindrical expansion of rod-shaped cells (Domínguez-Escobar *et al.*, 2011; Garner *et al.*, 2011;  
86 Hussain *et al.*, 2018). However, many questions remain to be answered. What prompts the assembly  
87 of MreB on the inner leaflet of the cytoplasmic membrane? What is the architecture of the membrane-  
88 associated MreB polymeric assemblies and how is it controlled? How is their distribution along the cell  
89 cylinder regulated? What is the length of individual MreB filaments within these assemblies and how  
90 is it controlled? Are the filaments stable? Do they exhibit turnover (treadmill) like actin filaments? *In*  
91 *vivo*, the length of MreB filamentous assemblies can be affected by the intracellular concentration of  
92 the protein (Billaudeau *et al.*, 2019; Salje *et al*, 2011), but seems to have little impact on MreB function  
93 (Billaudeau *et al.*, 2019). No turnover of MreB assemblies was detected *in vivo*, at least relative to their  
94 motion around the cell circumference (Domínguez-Escobar *et al.*, 2011; van Teeffelen *et al.*, 2011).  
95 Therefore, MreB polymers are believed to be quite stable despite their dynamic behavior in the cell.  
96 To elucidate in detail the molecular mechanisms underlying the functions of MreB, it remains  
97 necessary to understand their biochemical and polymerization properties. The majority of biochemical  
98 and structural studies on MreB proteins originally focused on the highly soluble G- MreB<sup>Tm</sup> (Bean &  
99 Amann, 2008; Esue *et al*, 2005; Esue *et al*, 2006; Popp *et al*, 2010b; van den Ent *et al.*, 2001; van den

100 Ent *et al*, 2010). The tendency to aggregation upon purification hampered most *in vitro* studies of  
101 MreBs from other species (Dersch *et al*, 2020; Gaballah *et al*, 2011; Mayer & Amann, 2009). More  
102 recently, MreBs from several G- bacteria and from the wall-less bacterium *Spiroplasma citri* (MreB<sup>5Sc</sup>)  
103 could be purified in a functional soluble form, albeit in much lower quantities than MreB<sup>Tm</sup> (Harne *et*  
104 *al*, 2020; Maeda *et al*, 2012; Nurse & Marians, 2013; Pande *et al*, 2022; Salje *et al.*, 2011; van den Ent  
105 *et al*, 2014). Direct binding to the cell membrane was shown for MreB from the G- *Escherichia coli* and  
106 *T. maritima* (Salje *et al.*, 2011). The N-terminal amphipathic helix of *E. coli* MreB (MreB<sup>Ec</sup>) was found to  
107 be necessary for membrane binding and also to cause the full-length purified protein to aggregate  
108 (Salje *et al.*, 2011). Although this N-terminal amphipathic helix is dispensable for polymerization, it is  
109 required for proper function of MreB<sup>Ec</sup> *in vivo* (Salje *et al.*, 2011). MreB<sup>Tm</sup> is devoid of such an N-  
110 terminal amphipathic helix, but instead possesses a small hydrophobic loop promoting membrane  
111 insertion that protrudes from the monomeric globular structure and was shown to also mediate  
112 membrane binding (Salje *et al.*, 2011).

113 Altogether, *in vitro* work on MreBs from G- bacteria has shown that MreB polymerizes into straight  
114 double filaments in the presence of nucleotides, both in solution and on lipid membrane surfaces  
115 (Harne *et al.*, 2020; Salje *et al.*, 2011; van den Ent *et al.*, 2014; van den Ent *et al.*, 2010), and that  
116 filaments can assemble into larger sheets by lateral interactions (Esue *et al.*, 2005; Esue *et al.*, 2006;  
117 Harne *et al.*, 2020; Nurse & Marians, 2013; Popp *et al.*, 2010b; van den Ent *et al.*, 2001; van den Ent *et*  
118 *al.*, 2014). Furthermore, work on *Caulobacter crescentus* MreB (MreB<sup>Cc</sup>) and MreB<sup>Ec</sup> indicated an  
119 antiparallel arrangement of the straight pairs of protofilaments (van den Ent *et al.*, 2014), in sharp  
120 contrast to the helical parallel pairs of protofilaments (double helix) characteristic of F-actin (Pollard,  
121 1990). While the parallel arrangement of a protofilament doublet generates polarity and allows the  
122 characteristic treadmilling of F-actin (Stoddard *et al*, 2017), the antiparallel arrangement in MreB  
123 protofilaments suggests a bidirectional polymerization/depolymerization mechanism (van den Ent *et*  
124 *al.*, 2014). The directionality and the kinetics of MreB polymerization, as well as the role of nucleotides  
125 in this process remain to be shown. ATPase activity has been reported in solution for MreB<sup>Tm</sup>, MreB<sup>Ec</sup>  
126 and, more recently, for MreB<sup>5Sc</sup> (Esue *et al.*, 2005; Esue *et al.*, 2006; Nurse & Marians, 2013; Pande *et*  
127 *al.*, 2022; Popp *et al.*, 2010b). However, the need for nucleotide binding and hydrolysis in  
128 polymerization remains unclear due to conflicting results, *in vivo* and *in vitro*, including the ability of  
129 MreB to polymerize or not in the presence of ADP or the non-hydrolysable ATP analogue AMP-PNP  
130 (adenylyl-imidodiphosphate). In addition, no electron microscopy (EM) images of protofilaments or  
131 atomic views of MreB from a G+ bacterium have been reported to date; all available EM and structural  
132 data are from G- species. In G+ bacteria, MreB proteins presumably have no N-terminal amphipathic  
133 helix (Salje *et al.*, 2011), and the genome usually encodes several MreB isoforms (in contrast to G- that

134 usually get by with a single *mreB* paralog), that may be related to their thicker and more complex CW  
135 structure (Chastanet & Carballido-Lopez, 2012). Inter- and intra-species differences in MreBs may exist  
136 at the structural or biochemical level, leading to differences in molecular interactions or biological  
137 functions.

138 In this study, we aimed to decipher for the first time fundamental structural and biochemical  
139 properties of MreB from a G+ bacterium. We successfully purified a soluble form of MreB from the G+  
140 thermophilic bacterium *Geobacillus stearothermophilus* (MreB<sup>Gs</sup>) and elucidated its crystal structure,  
141 confirming the classical actin/MreB fold. Polymerization assays showed that MreB<sup>Gs</sup> forms straight  
142 pairs of protofilaments in the presence of lipids and nucleotide triphosphate (either ATP or GTP).  
143 MreB<sup>Gs</sup> does not polymerize in free solution like its G- counterparts. We have also shown that the  
144 interaction with lipids is mediated by two spatially close hydrophobic motifs in MreB<sup>Gs</sup> monomers.  
145 Importantly, nucleotide hydrolysis was required for filament formation, in contrast to actin, which  
146 polymerizes spontaneously under physiological salt conditions and subsequently hydrolyzes ATP  
147 within the filament to promote depolymerization. Our results shed new light on the polymerization  
148 mechanism of MreB proteins.

149

## 150 **Results**

### 151 **Crystal structure of *G. stearothermophilus* MreB**

152 To overcome the notorious aggregation issues of MreB from mesophilic bacteria, we cloned and  
153 purified MreB from the thermophilic G+ bacterium *G. stearothermophilus* (MreB<sup>Gs</sup>). We chose *G.*  
154 *stearothermophilus* because of its proximity to the *Bacillus* genus and because of the highly conserved  
155 sequence of MreB<sup>Gs</sup> compared to MreB from the model G+ bacterium *B. subtilis* (MreB<sup>Bs</sup>). MreB<sup>Bs</sup> is  
156 more closely related to MreB<sup>Gs</sup> (85.6 % identity and 92.6 % similarity) than to MreB of G- for which  
157 biochemical or structural data are available (either the thermophilic *T. maritima* with 55.8 % identity,  
158 or the mesophilic *C. crescentus*, 56.9 % identity and *E. coli*, 55.2 % identity) (Fig. S1).

159 MreB<sup>Gs</sup> was purified to homogeneity following a two-step procedure (see Materials and Methods). The  
160 protein could be purified in a soluble form (Fig. S2A and C) and remained functional for polymerization  
161 at concentrations below 13  $\mu$ M (0.5 mg/mL). When stored at higher concentrations or conserved at  
162 4°C, MreB<sup>Gs</sup> rapidly aggregated (Fig. S2A and B) and could not be recovered in a monomeric state,  
163 which is consistent with the known tendency of MreB proteins to aggregate.

164 The purified MreB<sup>Gs</sup> protein was crystallized and the structure of its apo form was solved at 1.8 Å  
165 resolution (Protein Data Bank [PDB] ID 7ZPT). The crystals belong to the monoclinic P2<sub>1</sub> space group

166 and contain one molecule of MreB<sup>Gs</sup> per asymmetric unit (Table S1). Monomers of apo MreB<sup>Gs</sup> display  
167 the canonical fold of actin-like proteins, characterized by four subdomains IA, IIA, IB and IIB (Fig. 1A).  
168 One of the most similar structures to apo MreB<sup>Gs</sup> is the apo form of MreB<sup>Tm</sup> (PDB ID 1JCF, (van den Ent  
169 *et al.*, 2001), with a rmsd of 1.92 Å over 305 superimposed Cα atoms and a Z-score of 16.0.  
170 Superimposition of the two proteins (Fig. 1A) revealed that MreB<sup>Gs</sup> is in a slightly more open  
171 conformation than MreB<sup>Tm</sup>, mainly due to a movement of domain IB, which is the less conserved within  
172 the actin superfamily of proteins. Loop β6-α2, which connects subdomains IA and IB and closes the  
173 nucleotide-binding pocket is partially disordered in apo MreB<sup>Gs</sup>. In domain IA, the hydrophobic loop  
174 α2-β7, which has been shown to be involved in MreB<sup>Tm</sup> membrane binding (Salje *et al.*, 2011) and is 2  
175 residues longer in MreB<sup>Gs</sup> (Fig. S1), displays a distinct conformation, packed on the N-terminal  
176 extremity of the polypeptide chain.

177 Crystal packing analysis revealed that MreB<sup>Gs</sup> molecules associate into straight protofilaments (Fig. 1B)  
178 characterized by a subunit repeat distance of 51 Å, similar to that observed in protofilaments of crystal  
179 structures of other actin homologs (Harne *et al.*, 2020; Pande *et al.*, 2022; Roeben *et al.*, 2006; van den  
180 Ent *et al.*, 2014). However, because of the open conformation of MreB<sup>Gs</sup> (Fig. 1A), the interaction mode  
181 of the subunits observed in MreB<sup>Gs</sup> protofilaments (Fig. 1C) is slightly different from that observed in  
182 protofilaments of MreB<sup>Tm</sup> (Fig. 1D) (van den Ent *et al.*, 2001), with domain IB interacting only with  
183 domain IA and not with domain IIA. While each interface in the MreB<sup>Gs</sup> protofilament (Fig. 1C) is  
184 characterized by a solvation energy gain ΔG of -7.1 kcal/mol, this value reaches -12.4 kcal/mol for  
185 MreB<sup>Tm</sup> (PDB ID 1JCF) and -9.5 kcal/mol for MreB<sup>Cc</sup> (PDB ID 4CZI), suggesting that the apo form of  
186 MreB<sup>Gs</sup> forms less stable protofilaments than its G- homologs.

187

### 188 **MreB<sup>Gs</sup> polymerizes into straight pairs of protofilaments in the presence of lipids**

189 Next, we investigated the polymerization of MreB<sup>Gs</sup> by EM of negatively stained samples. No filaments  
190 were observed under conditions in which MreB proteins from G- bacteria have been shown to  
191 polymerize in solution (Esue *et al.*, 2005; Esue *et al.*, 2006; Maeda *et al.*, 2012; Nurse & Mariani, 2013;  
192 Salje *et al.*, 2011; van den Ent *et al.*, 2001) (Fig. 2A and Table S2), suggesting that the purified protein  
193 was either nonfunctional for self-assembly or that a critical factor was missing. *In vivo*, MreB<sup>Bs</sup> forms  
194 membrane-associated nanofilaments (Billaudeau *et al.*, 2019; Hussain *et al.*, 2018; Jones *et al.*, 2001),  
195 and MreB filaments from G- bacteria have been shown to have intrinsic affinity for membranes  
196 (Garenne *et al.*, 2020; Maeda *et al.*, 2012; Salje *et al.*, 2011; van den Ent *et al.*, 2014). We hypothesized  
197 that the presence of lipids might be a prerequisite for the assembly of MreB<sup>Gs</sup> polymers. On a lipid  
198 monolayer of total *E. coli* lipid extract, MreB<sup>Gs</sup> readily formed filaments in the presence of ATP, which

199 would not be observed without the biomimetic membrane (Fig. 2A). Polymers were only observed at  
200 a concentration of MreB above 0.55  $\mu\text{M}$  (0.02 mg/mL) (Fig. 2B and Table S2).

201 The simplest assemblies were paired protofilaments, as observed for MreB<sup>Tm</sup> both in the presence and  
202 in the absence of lipids (Salje *et al.*, 2011), for MreB<sup>Cc</sup> assembled on lipid monolayers (van den Ent *et*  
203 *al.*, 2014) and for MreB<sup>Sc</sup> in solution (Pande *et al.*, 2022). Pairs of MreB<sup>Gs</sup> filaments are generally  
204 straight, and individual protofilaments were never observed. Paired protofilaments of different  
205 lengths, ranging from below 50 nm up to several micrometers, as well as two-dimensional sheets of  
206 straight dual protofilaments could be observed on the same EM grid (Fig. 2A and C, and Fig. S3). In  
207 addition, pairs of filaments and sheets always lay flat, indicating that they are oriented relative to the  
208 membrane surface. The diffraction patterns of the sheets showed a longitudinal repeat of 54 Å and a  
209 lateral spacing of 31 Å (Fig. 2C and D). 2D averaging of negatively stained EM images of 1 554 individual  
210 pairs of filaments (Fig. 2E and Fig. S4) also displayed a longitudinal subunit repeat of 54 Å and a lateral  
211 subunit repeat of 31 Å, and could well accommodate two scaled protofilaments found in the MreB<sup>Gs</sup>  
212 crystals (Fig. 2E). However, it is not possible to derive the orientation of the protofilaments from the  
213 EM density obtained from 2D averaging.

214 MreB<sup>Gs</sup> filaments also formed on lipid bilayers as observed by cryo-electron microscopy (cryo-EM). To  
215 this end, we prepared liposomes from *E. coli* lipid total extract, and incubated them with MreB<sup>Gs</sup> and  
216 ATP. Lipid vesicles alone were spherical (Fig. S5A), but vesicles decorated with MreB<sup>Gs</sup> filaments  
217 appeared strongly deformed, forming faceted and tubular structures (Fig. 2F and Fig. S5B). These  
218 deformed vesicles confirmed that MreB<sup>G</sup> was bound to the membrane. MreB<sup>Gs</sup> largely coated the  
219 liposomes and displayed a regular pattern along the cross-section of the tubulated vesicles (Fig. 2F and  
220 G). This pattern is compatible with longitudinal sections of 2D-sheets of straight filaments aligned in  
221 parallel to the longitudinal axis of the cylinder, as previously suggested for the arrangement of MreB<sup>Tm</sup>  
222 in rigid lipid tubes (van den Ent *et al.*, 2014).

223

#### 224 **ATP or GTP hydrolysis is required for MreB<sup>Gs</sup> polymerization**

225 In actin, ATP binding or hydrolysis are not required for polymerization (De La Cruz *et al.*, 2000; Kasai *et*  
226 *al.*, 1965). ATP hydrolysis only occurs subsequent to the polymerization reaction, destabilizing the  
227 filaments upon release of the  $\gamma$ -phosphate (Korn, 1982; Korn *et al.*, 1987). In contrast, MreB<sup>Tm</sup> was  
228 reported to require either ATP or GTP to polymerize (Esue *et al.*, 2006; Nurse & Marians, 2013; van  
229 den Ent *et al.*, 2001). MreB from *E. coli*, *C. crescentus*, *S. citri* and *Leptospira interrogans* also formed  
230 polymers in the presence of ATP, but the requirement of ATP for polymerization was not clearly



231 established (Barko *et al.*, 2016; Harne *et al.*, 2020; Maeda *et al.*, 2012; Nurse & Mariani, 2013; Salje *et al.*, 2011; van den Ent *et al.*, 2014). Filaments or sheets of filaments were also observed in the presence  
232 of ADP (Gaballah *et al.*, 2011; Pande *et al.*, 2022; Popp *et al.*, 2010b) or AMP-PNP (Pande *et al.*, 2022;  
233 Salje *et al.*, 2011).

235 Next, we wondered about the specificity of MreB<sup>Gs</sup> toward nucleotides and their role in the  
236 polymerization cycle. MreB<sup>Gs</sup> formed straight pairs of protofilaments and sheets in the presence of  
237 either ATP or GTP, as shown by negative stain EM (Fig. 3A). Noteworthy, the average length of double  
238 filaments was increased in the presence of GTP compared to ATP (Fig. S6A), which may reflect  
239 differential affinity, dissociation rate or hydrolytic activity of the two nucleotide triphosphates (NTPs).  
240 Next, we asked whether the nucleotides diphosphate and monophosphate could also support polymer  
241 assembly. As shown in Figure 3A, neither ADP nor GDP or AMP supported filament formation,  
242 suggesting that binding and/or hydrolysis of NTPs is required for MreB<sup>Gs</sup> filament assembly on the lipid  
243 monolayer. To discriminate between ATP binding and ATP hydrolysis, we used the non-hydrolysable  
244 ATP analogues AMP-PNP and ApCpp (5'-adenylyl methylenediphosphate). No filaments were detected  
245 in the presence of either AMP-PNP or ApCpp (Fig. 3A), suggesting that NTP hydrolysis triggers MreB<sup>Gs</sup>  
246 polymerization. However, differential affinity of MreB for these nucleotides could also explain these  
247 results. Both actin (Cooke & Murdoch, 1973; Iyengar & Weber, 1964; Kinosian *et al.*, 1993) and MreB<sup>Cc</sup>  
248 (van den Ent *et al.*, 2014) have the highest affinity for ATP, followed by ADP and then by AMP-PNP. To  
249 exclude that the absence of polymerization was due to reduced nucleotide binding, we first increased  
250 the concentration of ADP and AMP-PNP from 2 mM to 50 mM. Again, no polymers were detected in  
251 the negatively stained samples (Fig. S6B). Next, we performed a competition experiment by mixing  
252 ATP (1mM) with increasing amounts of AMP-PNP (1, 10 and 25 mM) in the polymerization reaction.  
253 Increasing amounts of AMP-PNP efficiently decreased the presence of MreB<sup>Gs</sup> filaments on the EM  
254 grids (Fig. 3B), indicating that AMP-PNP binds to MreB<sup>Gs</sup> but does not support efficient polymerization.  
255 Taken together, these results suggest that ATP hydrolysis is required for assembly of MreB<sup>Gs</sup> into  
256 filaments on a membrane surface.

257

## 258 **Nucleotide hydrolysis is required for binding of MreB<sup>Gs</sup> to the membrane, as monolayered MreB** 259 **films**

260 We next wondered whether NTP hydrolysis triggers the binding of MreB<sup>Gs</sup> monomers to the membrane  
261 prior to polymerization or whether it promotes the polymerization of membrane-bound monomers.  
262 To address this question, we turned to quartz crystal microbalance with dissipation monitoring (QCM-



263 D) to measure the binding affinity of MreB<sup>Gs</sup> to supported lipid bilayers (SLBs) of various lipid mixtures.  
264 QCM-D is a surface-sensitive technique that can be used to measure biomolecular interactions at  
265 aqueous interfaces in real time (Reviakine *et al*, 2011). Changes in frequency ( $\Delta f$ ) and dissipation ( $\Delta D$ )  
266 are recorded. The frequency is directly proportional to any mass added or removed (Sauerbrey, 1959),  
267 while dissipation changes are indicative of the viscoelastic properties of the attached layer. QCM-D  
268 was previously applied to study, for example, the binding affinity of the division proteins MinD and  
269 MinE of *E. coli* to SLBs (Renner & Weibel, 2012). *E. coli* and *B. subtilis* membranes are mainly composed  
270 of phospholipids, with the anionic phosphatidylglycerol (PG) and the zwitterionic  
271 phosphatidylethanolamine (PE) being the dominant species (Bernat *et al*, 2016; Bishop *et al*, 1967; den  
272 Kamp *et al*, 1969; Laydevant *et al*, 2022; Nickels *et al*, 2017; Seydlova & Svobodova, 2008; Sohlenkamp  
273 & Geiger, 2016). Although lipid proportions vary widely depending on the strains and growth  
274 conditions, PE is largely dominant in *E. coli* while PG is more dominant in *B. subtilis*, indicating that  
275 phospholipids are more negatively charged in G+ membranes. To mimic *Bacillus* membranes in our  
276 QCM-D assay, we used mixtures of the zwitterionic dioleoylphosphatidylcholine (DOPC) doped with  
277 the anionic dioleoylphosphatidylglycerol (DOPG) in different proportions (100% DOPC, 90:10  
278 DOPC:DOPG, 80:20 DOPC:DOPG) to generate SLBs. DOPC was selected to replace PE because of its  
279 widespread role as a scaffold lipid in SLBs formation. We had to adopt a mixture that enabled us to  
280 form SLBs on planar substrates, as the inverted conical shape of PE makes the formation of planar SLBs  
281 difficult (PE has a tendency to form non-bilayer structures because of its small headgroup). A typical  
282 SLBs signature experiment is shown in Fig. S7A-B. Briefly, SLBs are formed after the adsorption of  
283 liposomes ( $\Delta f$  decrease,  $\Delta D$  increase) onto activated silica surfaces. Once a critical surface  
284 concentration of liposomes is reached and the interactions between liposomes and the surface are  
285 suitable, the liposomes spontaneously rupture and coalesce into flat SLBs (Keller *et al*, 2000). After the  
286 formation of stable and flat SLBs (i.e. a stable baseline for frequency and dissipation) (Fig. S7A), we  
287 started to add MreB<sup>Gs</sup> to the SLBs (Fig. S7B, closed arrows). We recorded frequency and dissipation  
288 changes for the added MreB<sup>Gs</sup> protein (in varying concentrations  $\pm$  2mM ATP) on all SLBs. Binding was  
289 strongly dependent on ATP (Fig. 3C and S7C-D) and was substantially affected by the lipid composition  
290 of SLBs (Fig. S7C). Increasing the levels of DOPG led to a higher amount of MreB<sup>Gs</sup> binding, with  
291 DOPC:PG 80:20 giving the highest observed adsorption, suggesting that the presence of negatively  
292 charged lipids favors MreB<sup>Gs</sup> binding. Binding was detected almost instantaneously after adding  
293 MreB<sup>Gs</sup> (Fig. S7B, closed arrows) for all concentrations of MreB tested, either above or below the  
294 concentration in which polymers were observed by EM (0.55  $\mu$ M, Fig. 2B and Table S2). The protein  
295 binding kinetics reached an equilibrium after approximately 5-10 min with a somewhat slower  
296 continued binding of additional MreB<sup>Gs</sup> monomers (Fig. S7B). These observations suggested that in the  
297 presence of ATP both monomers and polymers of MreB<sup>Gs</sup> can interact with the membrane. However,

298 upon rinsing with the same buffer (Fig. S7B, open arrows), MreB<sup>Gs</sup> at low (monomeric) concentrations  
299 was completely removed from the membrane while polymeric MreB<sup>Gs</sup> remained more stably  
300 absorbed. When replacing ATP with ADP or AMP-PNP, we were not able to detect any significant  
301 binding, indicating a virtually complete loss of interaction (Fig. 3C). We further increased the  
302 concentration of ADP or AMP-PNP to exclude the possibility that the binding was simply affected by a  
303 decreased affinity of MreB<sup>Gs</sup> for these nucleotides. Higher concentrations of ADP and AMP-PNP did not  
304 restore the binding of MreB<sup>Gs</sup> to the SLBs (Fig. S7D). We concluded that nucleotide hydrolysis provides  
305 the energy required for MreB<sup>Gs</sup> membrane binding and that filaments bind more stably than MreB<sup>Gs</sup>  
306 monomers.

307 Finally, we used the Sauerbrey model (Sauerbrey, 1959) to calculate the average coverage and  
308 thickness of the layer of MreB<sup>Gs</sup> attached to the SLB. The thickness of the MreB films ranged from 0.1  
309 nm to approximately 4 nm on the SLBs with a ratio of DOPC:DOPG 80:20, which corresponds to ~ 2.5%  
310 to 100% coverage assuming a monolayer filament thickness (Fig. S7E and Material and Methods).  
311 These data suggest that MreB<sup>Gs</sup> mainly form monolayers on the SLBs, with limited out-of-plane  
312 interactions (i.e. limited tendency to stack into multilayers), consistent with our EM observations of  
313 pairs of filaments and sheets lying flat on the lipid monolayer (Fig. 2, Fig. 3 and Fig. S3), with the pattern  
314 displayed by the filaments on cross-sections of vesicles (Fig. 2G), and thus with the interaction of the  
315 membrane with a specific surface of the MreB<sup>Gs</sup> filaments. Taken together, these observations suggest  
316 an oriented arrangement of MreB<sup>Gs</sup> filaments on the membrane, with lateral interactions between  
317 filaments in the plane perpendicular to their membrane-binding surface.

318

### 319 **The amino-terminus and the $\alpha 2\beta 7$ hydrophobic loop of MreB<sup>Gs</sup> are required for membrane binding** 320 **and polymerization**

321 In MreB<sup>Tm</sup>, membrane-binding is mediated by a small loop containing two hydrophobic residues (L93  
322 and F94), whereas in MreB<sup>Ec</sup> and MreB<sup>Cc</sup> it is mediated by an amino terminal extension (~9 residues)  
323 predicted as an amphipathic helix, which is disordered in all crystal structures of MreB<sup>Cc</sup> (Salje *et al.*,  
324 2011; van den Ent *et al.*, 2014), (Fig. S1, green highlights). Albeit essential to MreB function in *E. coli*  
325 (Salje *et al.*, 2011), this N-terminal extension is not required for polymerization *in vitro* (Salje *et al.*,  
326 2011; van den Ent *et al.*, 2014). MreB<sup>Bs</sup> was not predicted to carry an N-terminal amphipathic helix  
327 (Salje *et al.*, 2011). A systematic search in a large panel of MreB proteins spanning over the entire  
328 bacterial kingdom revealed that N-terminal amphipathic helices are a conserved feature of the  
329 Proteobacteria phylum and most G- bacteria, but are absent from *Firmicutes* and *Bacteroidetes* species  
330 (Fig. S8). Most *Firmicutes*, including *Bacilli* (MreB<sup>Gs</sup> and MreB<sup>Bs</sup>) and *Clostridia* but to the notable

331 exception of the wall-less *Mollicutes* (or, put it in other words, G+ bacteria to the exception of  
332 *Actinobacteria*) possess a shorter N-terminal sequence containing 4-7 hydrophobic amino-acids (Fig.  
333 S1 and Fig. S8). We noticed that in the crystal structure of the apo form of MreB<sup>Gs</sup> this short  
334 hydrophobic N-terminal sequence is in close proximity to loop  $\alpha$ 2- $\beta$ 7 (Fig. 3A), which in MreB<sup>Tm</sup> carries  
335 the hydrophobic residues L93 and F94 involved in membrane binding (Salje *et al.*, 2011). The  $\alpha$ 2- $\beta$ 7  
336 loops of MreB<sup>Bs</sup> and MreB<sup>Gs</sup> contain additional hydrophobic residues (Fig. S1), suggesting that they may  
337 also play a role in membrane interaction. We constructed and purified mutants deleted for either four  
338 hydrophobic residues of the  $\alpha$ 2- $\beta$ 7 loop (aa 95-98, GLFA), the N-terminal sequence 2-7 (FGIGTK), or  
339 both (Table S3). Folding of the protein was not affected by the deletions as shown by circular dichroism  
340 (CD) (Fig. S9). The three mutants and the wild-type MreB<sup>Gs</sup> protein were set to polymerize in our  
341 standard conditions and the formation of filaments was assessed by negative stain EM. The three  
342 mutants displayed a dramatic reduction of their polymerization capabilities with a gradation of defects,  
343 the deletion of the N-terminal sequence having the lowest impact and the double deletion the highest  
344 (Fig. 4A and Fig. S10).

345 We next tested whether the polymerization defect observed with the mutants was due to a lack of  
346 interaction with the lipids, as expected. In QCM-D experiments, membrane adsorption in the presence  
347 of ATP was strongly reduced in the three mutants relative to the wild-type protein (Fig. 4B), mirroring  
348 the polymerization assays (Fig. 4A). As expected, in the presence of ADP, binding was not observed for  
349 any of the mutants, as observed with the wild-type protein (Fig. S7F). Taken together, these results  
350 suggest that the spatially close hydrophobic N-terminus and  $\alpha$ 2- $\beta$ 7 loop are the membrane anchors of  
351 MreB<sup>Gs</sup>. Deletion of these hydrophobic motifs prevents MreB<sup>Gs</sup> ATP-dependent binding to lipids, which  
352 in turn prevents filament formation.

353

#### 354 **$\gamma$ -phosphate dissociation after ATP/GTP hydrolysis by MreB<sup>Gs</sup> is related to filament turnover**

355 Our results indicate that MreB<sup>Gs</sup> has a limited intrinsic affinity for lipids, with nucleotide hydrolysis  
356 switching the protein from a soluble to lipid-affine form, potentially through a structural change. In  
357 order to test the impact of nucleotide binding, we co-crystallized MreB<sup>Gs</sup> with ATP-Mg and solved the  
358 crystal structures of the complex at 2.3 Å resolution (PDB ID 8AZG). The crystals diffracted in space  
359 group P2<sub>1</sub>2<sub>1</sub>2 (Table S1) and the analysis of the packing did not reveal the formation of protofilaments.  
360 The structure of the ATP-bound form of MreB<sup>Gs</sup> is highly similar to the apo form of the protein, with a  
361 rmsd of 1.41 Å over 313 aligned C $\alpha$  atoms (Fig. S11A). However, ATP binding induces a small closure  
362 of the nucleotide-binding pocket, and loop  $\beta$ 6- $\alpha$ 2, which was disordered in the apo structure, is now  
363 fully visible in the electron density map. The hydrophobic loop  $\alpha$ 2- $\beta$ 7 and the N-terminus also display

364 an alternative conformation. Interestingly, despite highly conserved nucleotide-binding residues, the  
365  $\gamma$ -phosphate of the bound ATP occupies the position of the Mg ion observed in the crystal structure of  
366 MreB<sup>Cc</sup> bound to the non-hydrolysable ATP analog AMP-PNP (PDB ID 4CZJ) (Fig. S11B and C). Despite  
367 multiple co-crystallization trials, crystal packing never revealed straight protofilaments like in the apo  
368 structure, only monomers were present in the ATP-bound state.

369 MreB of several G- bacteria was previously shown to slowly hydrolyze ATP in solution (Bean & Amann,  
370 2008; Esue *et al.*, 2005; Esue *et al.*, 2006; Gaballah *et al.*, 2011; Mayer & Amann, 2009; Nurse &  
371 Mariani, 2013; Pande *et al.*, 2022; Popp *et al.*, 2010b). Our QCM-D results suggested that ATP  
372 hydrolysis by MreB<sup>Gs</sup> is a prerequisite for membrane binding and polymerization, and that it may thus  
373 occur in solution too. We monitored ATPase activity by measuring the release of inorganic phosphate  
374 ( $P_i$ ) in the presence of ATP for a wide range of MreB concentrations, in the presence and in the absence  
375 of lipids. In the absence of lipids, the equilibrium rate of  $P_i$  dissociation was  $0.032 \pm 0.002$   $P_i$ /min/MreB  
376 molecule at 37°C, and  $0.081 \pm 0.004$   $P_i$ /min/MreB at 53°C, a temperature closer to the optimal growth  
377 temperature of *G. stearothermophilus* (Fig. 5A and Fig. S12A). In the presence of lipids, the rate of  $P_i$   
378 release increased  $\sim 2$ -fold, to  $0.065 \pm 0.005$   $P_i$ /min/MreB at 37°C and  $0.158 \pm 0.003$   $P_i$ /min/MreB at  
379 53°C (Fig. 5A and Fig. S12A). These rates of  $P_i$  release upon ATP hydrolysis ( $\sim 1$   $P_i$ /MreB in 6 min at 53°C)  
380 are comparable to those observed for MreB<sup>Tm</sup> and MreB<sup>Ec</sup> *in vitro* (Esue *et al.*, 2005; Esue *et al.*, 2006;  
381 Nurse & Mariani, 2013), and also remarkably similar to those of the (very slow) dissociation of  $\gamma$ -  
382 phosphate after ATP hydrolysis within actin filaments, which has a half-time of  $\sim 6$  min (dissociation  
383 rate constant  $\sim 0.003$   $\text{sec}^{-1}$ ) (Carlier & Pantaloni, 1986). Interestingly, the release of  $P_i$  was constant  
384 for hours, over the length of our ATPase experiments (Fig. 5B). However, similar density and lengths  
385 of negatively stained MreB<sup>Gs</sup> polymers were observed over the EM grids for all incubation  
386 (polymerization) times tested, ranging from a few minutes to several hours (Table S2). These  
387 observations suggest that MreB polymerization in the presence of lipids is a dynamic process, with  
388 steady state polymerization/depolymerization rates.

389 Finally, we have shown that, in solution, MreB<sup>Gs</sup> polymerizes in the presence of lipids and either ATP  
390 or GTP (Fig. 3A and Fig. S6A). MreB<sup>Tm</sup> was reported to polymerize in solution in the presence of ATP or  
391 GTP as well (Bean & Amann, 2008; Esue *et al.*, 2006; Nurse & Mariani, 2013; Popp *et al.*, 2010a; van  
392 den Ent *et al.*, 2001), and to release  $P_i$  at similar rates upon GTP and ATP hydrolysis (Esue *et al.*, 2006).  
393 We found that MreB<sup>Gs</sup> also releases  $P_i$  after hydrolysis of GTP as efficiently as after hydrolysis of ATP,  
394 both in the presence and in the absence of lipids (Fig. S12B).

395 Taken together, these results indicate that the presence of lipids is not required for the ATPase/GTPase  
396 activity of MreB<sup>Gs</sup>. However, the presence of lipids stimulates  $P_i$  release, advocating for some

397 conformational changes upon MreB<sup>Gs</sup> binding to the lipids and/or upon polymerization on the lipid  
398 surface. Furthermore, P<sub>i</sub> release is slow but constant over extended periods of time while filament  
399 length and density remain unchanged, suggesting a dynamic filament assembly/disassembly process.

400

## 401 Discussion

402 Here we show that bacterial actin MreB from the G+ bacterium *G. stearothermophilus* polymerizes  
403 into pairs of protofilaments on lipid membranes. In contrast to G- MreBs, which were shown to also  
404 polymerize in bulk solution, polymerization of MreB<sup>Gs</sup> was only observed in the presence of lipids. The  
405 requirement of the membrane for polymerization is consistent with the observation that MreB  
406 polymeric assemblies *in vivo* are membrane-associated only (i.e. localize at the cell periphery but not  
407 in the cytoplasm), in line with their role as scaffold of the CW elongation machinery. Membrane binding  
408 of MreB<sup>Gs</sup> is direct and mediated by the hydrophobic  $\alpha$ 2- $\beta$ 7 loop protruding from the protein in domain  
409 IA, in line with the prediction of Salje and colleagues that binding to membranes via such hydrophobic  
410 loop and/or an amphipathic helix may be conserved for all MreBs (Salje *et al.*, 2011). However, we  
411 found that binding of MreB<sup>Gs</sup> to the membrane is also mediated by the hydrophobic N-terminus which,  
412 together with the spatially closed  $\alpha$ 2- $\beta$ 7 loop, would constitute a membrane anchor. The absence of  
413 an amphipathic helix and the presence instead of a hydrophobic N-terminus in many MreB sequences  
414 (Fig. S8) suggests that most MreB use one or the other amino-terminal structure to bind to  
415 membranes.

416 Another difference relative to G- MreBs concerns the requirement of NTP hydrolysis for membrane  
417 binding and polymerization of MreB<sup>Gs</sup>. It was reported that membrane binding by MreB<sup>Tm</sup> is not  
418 dependent on nucleotide binding or hydrolysis (Salje *et al.*, 2011). Furthermore, G- MreBs polymerized  
419 in the absence of added lipids (Barko *et al.*, 2016; Esue *et al.*, 2005; Esue *et al.*, 2006; Harne *et al.*, 2020;  
420 Maeda *et al.*, 2012; Nurse & Mariani, 2013; Popp *et al.*, 2010b; Salje *et al.*, 2011; van den Ent *et al.*,  
421 2001), indicating that membrane binding is not a prerequisite for their polymerization. As  
422 demonstrated here, membrane binding by *Geobacillus* MreB requires not only binding but also  
423 hydrolysis of the nucleotide, either ATP or GTP. The role of nucleotides on the polymerization of G-  
424 MreBs is somewhat confusing in the literature as it varies significantly between reports, even for MreBs  
425 from the same species. ATP was found to be essential for G- MreBs polymerization in some reports  
426 (Barko *et al.*, 2016; Esue *et al.*, 2005; Nurse & Mariani, 2013; van den Ent *et al.*, 2001) while other  
427 reports indicate that polymerization also occurs in the presence of ADP (Bean & Amann, 2008; Gaballah  
428 *et al.*, 2011; Mayer & Amann, 2009; Pande *et al.*, 2022; Popp *et al.*, 2010b) or AMP-PNP (Pande *et al.*,  
429 2022; Salje *et al.*, 2011). Filaments were observed for MreB<sup>Tm</sup> and MreB<sup>5Sc</sup> in the presence of AMP-

430 PNP, but polymerization in the presence of ADP was in most cases concluded from light scattering  
431 experiments alone, so the possibility that aggregation rather than ordered polymerization occurred in  
432 the process cannot be excluded. Differences in the purity of the nucleotide stocks used in these studies  
433 could also explain some of the discrepancies. On the basis of our data and the existing literature, we  
434 propose that the requirement for ATP (or GTP) hydrolysis for polymerization may be conserved for  
435 most MreBs.

436 Taken together, our data suggest a model (Fig. 6) in which nucleotide hydrolysis by MreB<sup>Gs</sup> in solution  
437 may induce a conformational change that allows the membrane-binding motifs of MreB<sup>Gs</sup> monomers  
438 to interact with the membrane, possibly in an ADP-P<sub>i</sub>-MreB state as suggested by the very slow rate of  
439 P<sub>i</sub> release. Comparison of the crystal structures of apo MreB<sup>Gs</sup> and its ATP-bound form shows that only  
440 minor conformational changes occur upon nucleotide-binding, in agreement with what was observed  
441 when comparing crystal structures of MreB<sup>Cc</sup> and MreB5<sup>Sc</sup> in different nucleotide-bound states (Harne  
442 *et al.*, 2020; Pande *et al.*, 2022; van den Ent *et al.*, 2014). This invariability of folding regardless of the  
443 bound ligands has also been observed in crystal structures of actin and other members of the actin  
444 superfamily (Schuler, 2001). ATP hydrolysis and membrane binding might require small but dynamic  
445 structural changes that cannot be observed in crystal structures locked in a conformation imposed by  
446 the packing. The absence of protofilaments in the crystal packing of the ATP-MreB<sup>Gs</sup> complex indicates  
447 that the surface of ATP-bound MreB monomers was not prone to interaction despite the very high  
448 concentration of protein and the crystal packing forces (which explain filament formation in the  
449 crystals of the apo form). It is tempting to speculate that ATP-bound MreB is soluble and that  
450 polymerization is linked to structural changes upon ATP hydrolysis, consistent with our finding that  
451 NTP hydrolysis is required for MreB<sup>Gs</sup> polymerization. Membrane interaction upon nucleotide  
452 hydrolysis would promote polymerization, possibly through a second conformational change (Fig. 6).  
453 This second conformational change may favor P<sub>i</sub> release since the release rate increased 2-fold in the  
454 presence of lipids. The rate of P<sub>i</sub> release from MreB<sup>Gs</sup> filaments remained nevertheless low, consistent  
455 with previous reports on MreB<sup>Tm</sup>, MreB<sup>Ec</sup> and MreB5<sup>Sc</sup> (Bean & Amann, 2008; Esue *et al.*, 2005; Esue  
456 *et al.*, 2006; Nurse & Mariani, 2013) and was strikingly similar to that from filamentous actin, where  
457 the P<sub>i</sub> release half-time (6 min) is much slower than the ATP hydrolysis half-time (~2 sec) (Pollard,  
458 2016). Thus, for both MreB and actin, despite hydrolyzing ATP before and after polymerization,  
459 respectively, the ADP-P<sub>i</sub>-MreB intermediate would be the long-lived intermediate state within the  
460 filaments. In actin, the release of γ-phosphates after ATP hydrolysis within the filaments induces a  
461 conformational change that destabilizes the filament and promotes depolymerization. Importantly,  
462 the release of the γ-phosphate by MreB<sup>Gs</sup> in polymerization conditions continued well after steady-  
463 state levels of polymerization were achieved (Fig. 5B). Two scenarios could explain this: (i) a constant



464 but extremely slow release of  $P_i$  from stable filaments or (ii) a turnover of the filaments. We  
465 hypothesize that MreB filaments turnover and that, as in actin, the release of  $P_i$  is involved in this  
466 process.

467 Our EM and cryo-EM data show that MreB<sup>Gs</sup> filaments are straight and therefore most likely rather  
468 rigid. In agreement with this hypothesis, lipid vesicles coated with MreB<sup>Gs</sup> filaments were strongly  
469 deformed and faceted (Fig. 2E and Fig. S5B). However, MreB<sup>Gs</sup> filaments outside liposomes did not  
470 bend the liposomes into negative curves as previously reported for MreB<sup>Tm</sup> and MreB<sup>Cc</sup> (Salje *et al.*,  
471 2011; van den Ent *et al.*, 2014). A recent model postulates that MreB polymers are intrinsically curved  
472 and have affinity for negatively curved membranes while avoiding to be positively bent (Hussain *et al.*,  
473 2018; Wong *et al.*, 2019). The pattern of MreB<sup>Gs</sup> filaments in longitudinal sections of coated tubulated  
474 liposomes (Fig. 2G) is compatible with straight filaments aligning with the longitudinal axis of the rod  
475 to avoid positive curvature. However, the intrinsic affinity of MreB filaments for negative concave  
476 membrane curvature remains however to be conclusively demonstrated. The kinetics of  
477 polymerization of MreBs, as well as the presumed apolarity of growth of antiparallel doublets, are also  
478 questions for future studies.

479

## 480 **Materials and Methods**

### 481 **General procedures and growth conditions**

482 DNA manipulations were carried out by standard methods. *G. stearothermophilus* was grown at 59°C  
483 and *E. coli* at 37°C in rich lysogeny broth (LB). Kanamycin was used at 25 µg/mL. All strains used in this  
484 study are listed in Table S4. All lipids, *E. coli* Lipid Total Extract (TE), 1,2-Dioleoyl-sn-glycero-3-  
485 phosphocholine (DOPC), and 1,2-dioleoyl-sn-glycero-3-phospho-(1'-rac-glycerol) (DOPG), were  
486 purchased from Avanti Polar Lipids Inc. (Alabaster, AL).

487

### 488 **Cloning, expression and purification of MreB variants from *G. stearothermophilus***

489 Two *mreB* paralogs were identified in the genome of *G. stearothermophilus* ATCC 7953, corresponding  
490 to *mreB* and *mbl* of *B. subtilis* based on their synteny. The *mreB* ortholog displays a strong 92.6 %  
491 similarity (85.6 % overall identity) with *mreB* of *B. subtilis* (Fig. S1). *mreB* from *G. stearothermophilus*  
492 ATCC 7953 was amplified by PCR using primers cc430 and cc431 (Table S5) and *G. stearothermophilus*  
493 growing cells as template. A second DNA fragment was generated by PCR on a derivative of plasmid  
494 pET28a (devoid of the first three codons following the *NcoI* restriction site), using primers cc433/cc432



495 (Table S5). The two resulting fragments were assembled by isothermal assembly and transformed into  
496 *E. coli* (Gibson *et al*, 2009). The resulting plasmid, pCC110, which carries a wild-type version of *mreB*<sup>Gs</sup>  
497 in translational fusion with a 5' extension encoding a 6-histidine tag, was used as a template to  
498 generate pCC116, pCC117 and pCC115, carrying the *mreB*<sup>Gs</sup> gene deleted for codons 2-7 (FGIGTK), 102-  
499 105 (GLFA), or both, respectively. For this, pCC110 was PCR-amplified using primers cc582/cc583 (to  
500 generate pCC116) or cc584/cc585 (to generate pCC117) (Table S5) and the PCR products were treated  
501 with *DpnI* prior to transformation into *E. coli*. To generate pCC115, isothermal assembly was  
502 performed with two PCR products generated using primers cc582/cc585 and cc583/cc584 and pCC110  
503 as template, and the product was transformed into *E. coli*. Following extraction and sequencing, the  
504 four resulting pCC plasmids were transformed into the T7 *express E. coli* expression host (Table. S4).

505 The his-tagged proteins were produced in T7 *express E. coli* cells grown in LB broth supplemented with  
506 kanamycin. Expression of recombinant MreB was induced by the addition of IPTG at the final  
507 concentration of 1 mM, when cultures reached an optical density at 600 nm of 0.6. Expression was  
508 performed over-night at 15°C, with maximum aeration. Bacteria were harvested by centrifugation  
509 (5 000 *g* for 7 min at 4°C).

510 Pellets were resuspended in buffer A (20 mM Tris pH 7, 500 mM KCl) supplemented with EDTA-free  
511 complete protease inhibitor (Roche) and 250 µg/mL of lysozyme. Cells were disrupted by sonication  
512 on a Vibra-Cell VC505 processor (Sonic & Materials, Inc., Newton, CT, USA) for 10 min with 10 seconds  
513 on/off cycles at 50% power, and the supernatant was collected after clarification by centrifugation  
514 (40 000 *g* for 20 min at 4 °C). The 6-histidine-tagged MreB variants followed a two-step purification  
515 procedure. The proteins were first purified by affinity chromatography on a Ni-nitrilotriacetic acid (Ni-  
516 NTA) agarose resin (Thermo fisher scientific). The column was washed with buffer A supplemented  
517 with 20 mM imidazole, and proteins were eluted with a step gradient of imidazole (100 mM to 400  
518 mM) in buffer A. The collected fractions were analyzed by electrophoresis, using a 12% polyacrylamide  
519 precast gel (Mini-PROTEAN TGX stain free, Bio-Rad). Fractions containing the purest form of the  
520 proteins were loaded on a size exclusion chromatography HiLoad® 16/60 Superdex® 200 pg column  
521 (GE Healthcare Life Sciences / Cytiva), pre-equilibrated with buffer B (buffer A supplemented with 1  
522 mM DTT and 2 mM EDTA) connected to an AKTA FPLC system (GE Healthcare Life Sciences). Fractions  
523 corresponding to the elution peaks were analyzed by electrophoresis to assess the presence of MreB,  
524 pooled and concentrated with an ultrafiltration spin column (Vivaspin, 10 000 MWCO), up to a  
525 maximum of 0.5 mg/mL (14 µM), as determined from the absorption at 280 nm measured using a  
526 Nanodrop spectrophotometer (Thermo fisher scientific). The recombinant proteins were aliquoted  
527 and immediately frozen and stored at -20°C.

## 528 **Preparation of lipid monolayers and negative stain electron microscopy**

529 MreB was set to polymerize for 2-3 hours (unless stated otherwise, [Table S2](#)) at room temperature in  
530 the reaction buffer (4-20 mM Tris pH7, 100-500 mM KCl, 1-5 mM Mg<sup>2+</sup>) with or without a lipid extract  
531 and with or without nucleotide ([Fig. 2A](#), [Fig. S2A](#) and [Table S2](#)).

532 Polymerization of MreB on lipids was induced by creating a lipid monolayer on droplets containing  
533 MreB (typically 0.05 mg/mL) in the reaction buffer. Lipids from *E. coli* TE were dissolved to 2 mg/mL in  
534 chloroform in a glass vial and stored at -20°C. Lipid preparations were diluted in chloroform to a final  
535 concentration of 0.5 mg/mL on the day of the experiment. Approximately 200 nL of lipid preparation  
536 were dropped on top of the droplets containing MreB in the reaction buffer, previously placed on a  
537 solid support in a humid chamber, and incubated at room temperature. The standard reaction buffer  
538 supporting polymerization contained 20 mM Tris pH7, 500 mM KCl, 2 mM ATP and 5 mM Mg<sup>2+</sup>.

539 For TEM observations, a carbon-coated electron microscopy grid (CF300-Cu, Electron Microscopy  
540 Sciences), carbon side down, was placed on top of lipid-coated reaction droplets and gently lifted after  
541 2 minutes incubation. Grids were stained with either a solution of 2% uranyl formate or 1% uranyl  
542 acetate and air-dried prior to TEM observation. TEM images were acquired on a charge-coupled device  
543 camera (AMT) on a Hitachi HT 7700 electron microscope operated at 80kV (Milexia – France) or a  
544 Tecnai G2 LaB6 (Thermofischer FEI) microscope operated at 200 kV or a Tecnai Spirit (Thermofischer  
545 FEI) microscope operated at 80 kV.

546 Fourier Transformation of MreB sheets was done using ImageJ to obtain diffraction patterns. For 2D  
547 processing, a set of images was collected at a magnification of 50 000× with a pixel size of 2.13 Å per  
548 pixel and a defocus varying from -2 to -1 μm, using a Tecnai G2 LaB6 (Thermofischer FEI) microscope  
549 operated at 200 kV and a F-416 TVIPS 4K×4K camera. To obtain 2D class averages, particles were  
550 classified and aligned, using SPIDER (Frank *et al*, 1996). 1 554 Particles were windowed out into 99 ×  
551 99 pixels images by using the Boxer interface of EMAN (Ludtke *et al*, 1999) and appended into a single  
552 SPIDER file, then normalized against the background. One round of reference-free alignment and  
553 classification was performed before references were selected from the first-class averages. Several  
554 rounds of multireference alignment and classification were then performed, and new references were  
555 selected from the class averages until no further improvement was obtained.

556

## 557 **Quantification of MreB filaments on EM images**

558 We set up a protocol to compare, based on EM images and in a quantitative way, the propensity of  
559 MreB to form polymers between different conditions. To circumvent the issue of the highly

560 heterogeneous distribution of polymers on the EM grids that could bias the analysis, we acquired for  
561 each experimental replica, images on 12 random locations covering the entire grid. To determine the  
562 impact of the concentration of MreB or the nucleotides used on the formation of polymers, images  
563 were sorted based on the sole presence or absence of polymers (regardless of their density), and we  
564 plotted the % of fields containing MreB filaments. To accurately compare the effect of the  $\Delta N^{\text{ter}}$  and  
565  $\Delta \text{GLFA}$  deletions on MreB ability to polymerize, we refined the classification by sorting the images  
566 based on the density of polymers. For this, anonymized images of all strains from two replica were  
567 pooled and subsequently distributed based on the density of polymers (none, low density, or loan).  
568 16% of the images were discarded due to low quality. The remaining images were distributed based  
569 on the 3 groups and expressed as percentage of fields.

570

### 571 **Preparation of liposomes and cryo-electron microscopy**

572 *E. coli* TE was dissolved in chloroform, aliquoted, dried under a stream of argon, and desiccated for 1  
573 hour under vacuum. The liposome solution was made by resuspending desiccated TE in polymerization  
574 buffer (20 mM Tris-HCl pH 7, 500 mM KCl, 2 mM ATP, 5 mM  $\text{MgCl}_2$ ) on the day of the experiment, to a  
575 final lipid concentration of 1 mg/mL. 0.05 mg/mL of purified MreB was mixed with the liposome  
576 solution and incubated 2 h at room temperature. 4  $\mu\text{L}$  of sample were applied to a glow-discharged  
577 holey lacey carbon-coated cryo-electron microscopy grids (Ted Pella, USA). Most of the solution was  
578 blotted away from the grid to leave a thin (<100 nm) film of aqueous solution. The blotting was carried  
579 out on the opposite side from the liquid drop and plunge-frozen in liquid ethane at  $-181^\circ\text{C}$  using an  
580 automated freeze plunging apparatus (EMGP, Leica, Germany). The samples were kept in liquid  
581 nitrogen and imaged using a Tecnai G2 (FEI, Eindhoven, Netherlands) microscope operated at 200 kV  
582 and equipped with a  $4\text{k} \times 4\text{k}$  CMOS camera (F416, TVIPS). The imaging was performed at a  
583 magnification of 50 000 $\times$  with a pixel size of 2.13  $\text{\AA}$  using a total dose of 10 electrons per  $\text{\AA}^2$ .

584

### 585 **Circular dichroism**

586 The secondary structure of recombinant WT and mutant forms of MreB were analyzed by circular  
587 dichroism (CD). Far-UV spectra were recorded on a J-810 spectropolarimeter (Jasco). Spectra were  
588 recorded from 260 to 200 nm at  $20^\circ\text{C}$  in 1 mm path-length quartz cuvette at a protein concentration  
589 of 10  $\mu\text{M}$  in 50 mM  $\text{NaPO}_4$  buffer at pH 7. Each CD spectrum was obtained by averaging 4 scans  
590 collected at a scan rate of 200 nm/min. Baseline spectra obtained with buffer were subtracted for all  
591 spectra.

592

### 593 **Preparation of liposomes and QCM-D measurements**

594 DOPC and DOPG lipid mixtures were prepared in chloroform as described above except that  
595 desiccation was performed overnight. The lipids were rehydrated in 10 mM Tris pH 7.0, 100 mM NaCl,  
596 5 mM MgCl<sub>2</sub> buffer at a final concentration of 5 mg/mL using three consecutive cycles of freezing in  
597 liquid nitrogen and thawing in an ultrasonic bath (Merck). The rehydrated lipid solutions were extruded  
598 21 times through a 100 nm diameter pore size polycarbonate membrane (Avanti Polar Lipids Inc.). The  
599 extruded solutions were stored at 4°C and consumed within a week after preparation.

600 A QCM-D E4 (QSense AB, Biolin Scientific AB, Gothenburg, Sweden) was used to measure MreB binding  
601 to planar supported lipid bilayers (SLBs) as previously reported for MinD and MinE (Renner & Weibel,  
602 2012). Briefly, during QCM-D measurements, frequency and dissipation changes are recorded based  
603 on the piezoelectric properties of the crystal probe (Rodahl *et al.*, 1995). The quartz crystals (QSense  
604 AB, Biolin Scientific AB, Gothenburg, Sweden) were coated with a custom 50 nm-thick layer of silicon  
605 dioxide by chemical vapor deposition (GeSiM GmbH, Dresden, Germany). Prior to each measurement,  
606 quartz crystals were thoroughly cleaned in a 1:1:5 volumetric ratio of concentrated ammonium  
607 hydroxide (Sigma-Aldrich), 30% hydrogen peroxide (Sigma Aldrich), and ultrapure water (Merck) at  
608 70°C for 3 min. Prior to liposome deposition, the quartz crystals were then placed and oxidized in a  
609 plasma cleaner (Harrick Plasma, Ithaca, NY) for 2 min at high radio frequency. The oxidized (activated)  
610 crystals were placed into the QCM-D measurement chambers and immediately covered with 10 mM  
611 Tris buffer, 100 mM NaCl and 5 mM MgCl<sub>2</sub>. Subsequently, after a stable baseline was established, a  
612 liposome working solution (0.2 mg/mL) was pumped into the measurement chambers at 200 µL/min.  
613 After 2-20 min of incubation, a characteristic profile of supported planar lipid bilayer formation was  
614 observed (Fig. S7A) (Keller *et al.*, 2000). After 5 min, the SLBs were rinsed with 10 mM Tris buffer  
615 containing 100 mM NaCl and 5 mM MgCl<sub>2</sub> to remove unbound vesicles at 100 µL/min. The buffer was  
616 next exchanged to the reaction buffer (20 mM Tris-HCl pH 7, 500 mM KCl, 1 mM DTT and 2 mM EDTA).  
617 After a stable baseline was observed, MreB ( $\pm$  ATP, ADP, AMP-PNP) in reaction buffer (20 mM Tris-HCl  
618 pH 7, 500 mM KCl, 1 mM DTT, 5mM MgCl<sub>2</sub>) was added at 0.1, 0.5, 1 and 5 µM (low to high  
619 concentration) to the SLB at a pump speed of 100 µL/min for 5 min. The adsorption of MreB wild-type  
620 and mutants was measured for at least 20 min before exchanging and rinsing with reaction buffer for  
621 5 min at 100 µL/min. In a series of experiments (from low to high MreB concentration), MreB was  
622 almost completely displaced by the rinsing step, allowing multiple adsorption steps on a single SLB.  
623 However, at higher MreB concentrations the rinsing was only partially effective (Fig. S7B). To avoid  
624 history effects on a SLB, we also reversed the MreB concentration steps (from high to low  
625 concentration). We calculated the thickness from frequency shifts using the Sauerbrey model included

626 in the commercial analysis software tool QTools (QSense AB, Biotin Scientific AB, Gothenburg,  
627 Sweden). Each measurement was repeated at least twice with 2-3 repeats.

628

### 629 **NTPase activity assay**

630 ATPase and GTPase activity of MreB were assayed by measuring the release of free inorganic  
631 phosphate ( $P_i$ ) in a colorimetric assay using malachite green (Kodama *et al*, 1986; Mao *et al*, 2017).  $P_i$   
632 produced was measured after a fix (end-point) or various (kinetic) incubation times in the reaction  
633 buffer (20 mM Tris, 500 mM KCl, 5 mM  $MgCl_2$ ) with appropriate supplements (e.g. 0.5 mM ATP or GTP,  
634 0.05 mg/mL liposomes). The liposome solution was made on the day of the experiment by  
635 resuspending desiccated TE in water to 1 mg/mL. The reaction was initiated by the addition of MreB  
636 to the reaction mixture and ended by addition of 1 reaction volume of malachite revelation buffer (0.2  
637 % (w/v) ammonium molybdate, 0.7 M HCl, 0.03 % (w/v) malachite green, 0.05 % (v/v) Triton X-100).  
638 Incubations were performed at 53°C and 37°C for 1h (end point) or less (kinetics). The quantity of  $P_i$   
639 produced was determined by measuring the absorbance at 650 nm on a 96-well plate  
640 spectrophotometer (Synergy 2, Biotek). A mock reaction devoid of protein constituted the blank. A  
641 standard curve was made with a range of  $KH_2PO_4$  diluted in the reaction buffer.

642

### 643 **Crystallization, structure determination and refinement**

644 Freshly purified MreB<sup>Gs</sup> containing an N-terminal His6-tag (stored in 20 mM Tris pH7, 500 mM KCl, 2  
645 mM EDTA, 1 mM DTT) was concentrated by centrifugation using a vivaspin 5 000 MWCO membrane  
646 tube. All crystallization assays were performed at 293 K by sitting-drop vapor diffusion using facilities  
647 from the crystallization platform of I2BC. Crystals of apo MreB<sup>Gs</sup> were obtained from a 100:100 nL  
648 mixture of protein at 3 mg/mL with a crystallization solution composed of 33% polyethylene glycol  
649 (PEG) 300 in 0.1 M MES pH 6.7. For co-crystallization assays, 10 mM ATP-Mg was added to 6 mg/mL of  
650 protein. Crystals of the complex were obtained with a crystallization solution containing 16% PEG 8000,  
651 20% Glycerol and 0.04 M potassium phosphate. All crystals were flash-frozen in liquid nitrogen before  
652 data collection. Diffraction-quality crystals attained their full sizes in roughly 10-14 days.

653 Diffraction data were recorded on beam line PROXIMA 1 (synchrotron SOLEIL, France) at a wavelength  
654 of 0.9786 Å. Data were processed with the XDS package (Kabsch, 2010). All structures were solved by  
655 molecular replacement using the MOLREP program (Vagin & Teplyakov, 1997) using the crystal  
656 structure of MreB<sup>Cc</sup> (PDB ID 4CZJ) (van den Ent *et al.*, 2014), and the models were refined using PHENIX  
657 (Liebschner *et al*, 2019). The models were further improved by iterative cycles of manual rebuilding

658 using COOT (Emsley *et al*, 2010). Final structural models were deposited in the Protein Data Bank (PDB)  
659 (Berman *et al*, 2000). Statistics for all the data collections, refinement of the different structures and  
660 the PDB codes are summarized in [Table S1](#). All structural figures were generated with PyMOL (The  
661 PyMOL Molecular Graphics System, version 1.2r3pre, Schrödinger, LLC n.d.). Protein structure  
662 comparison was performed using the PDBeFold service at European Bioinformatics Institute  
663 (<http://www.ebi.ac.uk/msd-srv/ssm>) (Krissinel & Henrick, 2004). Protein interfaces, surfaces and  
664 assemblies were analyzed using the PDBePISA service at European Bioinformatics Institute  
665 ([http://www.ebi.ac.uk/pdbe/prot\\_int/pistart.html](http://www.ebi.ac.uk/pdbe/prot_int/pistart.html)) (Krissinel & Henrick, 2007).

666

## 667 **Acknowledgments**

668 We thank Davy Martin for CD acquisitions, Human Rezaei and Juan Hermoso for useful discussions and  
669 Xavier Henry for useful contributions upstream this work. This project has received funding from the  
670 European Research Council (ERC) under the European Union's Seventh Framework Program (FP7) and  
671 the Horizon 2020 research and innovation program (grant agreement No 311231 and grant agreement  
672 No 772178, respectively, to R.C.-L.). We also thank the Labex Cell(n)Scale (ANR-11-LABX0038), Paris  
673 Sciences et Lettres (ANR-10-IDEX-0001-02), and the Cell and Tissue Imaging (PICT-IBiSA), Institut Curie,  
674 member of the French National Research Infrastructure France-BioImaging (ANR-10-INBS-04). L.D.R.  
675 acknowledges funding by the VolkswagenStiftung. This work benefited from the expertise of Christine  
676 Péchoux at the MIMA2 facility (Université Paris-Saclay, INRAE, AgroParisTech, GABI, 78350, Jouy-en-  
677 Josas, France) for TEM observations <https://doi.org/10.15454/1.5572348210007727E12>, and of the  
678 crystallization platform of I2BC, supported by the French Infrastructure for Integrated Structural  
679 Biology (FRISBI, ANR-10-INBS-05-05). We acknowledge the synchrotrons ESRF (Grenoble, France) and  
680 SOLEIL (Saint-Aubin, France) for provision of synchrotron radiation facilities and we would like to thank  
681 the staffs of beamlines PROXIMA-2A and PROXIMA-1 at SOLEIL, and 1D23-2 at ESRF for assistance and  
682 advices during data collection.

683

## 684 **Authors contributions**

685 **Wei Mao:** Formal analysis; investigation; visualization; writing – original draft. **Lars D. Renner:** Formal  
686 analysis; investigation; methodology; validation; visualization; writing – review & editing. **Charlène**  
687 **Cornilleau:** Investigation. **Ines Li de la Sierra-Gallay:** Formal analysis; investigation, visualisation. **Sarah**  
688 **Benlamara:** Investigation. **Yoan Ah-Seng:** Investigation. **Herman Van Tilbeurgh:** Methodology. **Sylvie**

689 **Nessler:** Data curation; formal analysis; supervision; validation; visualization; writing – review &  
690 editing. **Aurélie Bertin:** Formal analysis; investigation; methodology; validation; visualization; writing  
691 – review & editing. **Arnaud Chastanet:** Conceptualization; data curation; formal analysis; investigation;  
692 methodology; supervision; validation; visualization; writing – original draft; writing – review & editing.  
693 **Rut Carballido-López:** Conceptualization; formal analysis; funding acquisition; project administration;  
694 supervision; validation; writing – original draft; writing – review & editing.

695 In addition to the [CRediT](#) individual author contributions listed above, the general contributions are:

696 R.C.-L. administrated and acquired the financial support for the project leading to this publication; A.C  
697 and R.C.-L. conceptualized, designed the work and supervised the project; L.D.R., I. L.d.I.S.-G., S.N., A.B,  
698 A.C. and R.C.-L. conceived experiments and validated results and experiments; W.M., L.D.R., C.C., I.d-  
699 G., S.B., A.B. and A.C., performed experiments or data collection; Y.A.-S. performed evidence  
700 collection; W.M., L.D.R., I. L.d.I.S.-G., S.N., A.B., A.C. and R.C.-L. analyzed and/or interpreted data; H.V.-  
701 T. contributed to scientific discussions; A.C. and R.C.-L. wrote a complete original draft and revised and  
702 edited the manuscript; W.M. contributed to the writing of part of an original draft; L.D.R., S.N. and A.B.  
703 contributed to the writing and review of the manuscript. All authors approved the manuscript and its  
704 contents.

705

## 706 **Disclosure and competing interests statement**

707 The authors declare that they have no conflict of interest.

708

## 709 **Supporting Information**

710 Supplementary Figures S1 to S12

711 Supplementary Tables S1 to S5

712



## 713 References

- 714 Barko S, Szatmari D, Bodis E, Turmer K, Ujfalusi Z, Popp D, Robinson RC, Nyitrai M (2016) Large-scale  
715 purification and in vitro characterization of the assembly of MreB from *Leptospira interrogans*.  
716 *Biochimica et biophysica acta* 1860: 1942-1952
- 717 Bean GJ, Amann KJ (2008) Polymerization properties of the *Thermotoga maritima* actin MreB: roles  
718 of temperature, nucleotides, and ions. *Biochemistry* 47: 826-835
- 719 Berman HM, Westbrook J, Feng Z, Gilliland G, Bhat TN, Weissig H, Shindyalov IN, Bourne PE (2000)  
720 The Protein Data Bank. *Nucleic acids research* 28: 235-242
- 721 Bernat P, Paraszkiwicz K, Siewiera P, Moryl M, Plaza G, Chojniak J (2016) Lipid composition in a  
722 strain of *Bacillus subtilis*, a producer of iturin A lipopeptides that are active against uropathogenic  
723 bacteria. *World J Microbiol Biotechnol* 32: 157
- 724 Billaudeau C, Chastanet A, Yao Z, Cornilleau C, Mirouze N, Fromion V, Carballido-Lopez R (2017)  
725 Contrasting mechanisms of growth in two model rod-shaped bacteria. *Nature communications* 8:  
726 15370
- 727 Billaudeau C, Yao Z, Cornilleau C, Carballido-Lopez R, Chastanet A (2019) MreB Forms Subdiffraction  
728 Nanofilaments during Active Growth in *Bacillus subtilis*. *MBio* 10
- 729 Bishop DG, Rutberg L, Samuelsson B (1967) The chemical composition of the cytoplasmic membrane  
730 of *Bacillus subtilis*. *Eur J Biochem* 2: 448-453
- 731 Bork P, Sander C, Valencia A (1992) An ATPase domain common to prokaryotic cell cycle proteins,  
732 sugar kinases, actin, and Hsp70 heat shock proteins. *Proceedings of the National Academy of Sciences*  
733 *of the United States of America* 89: 7290-7294
- 734 Cabeen MT, Jacobs-Wagner C (2010) The bacterial cytoskeleton. *Annual review of genetics* 44: 365-  
735 392
- 736 Carballido-Lopez R (2017) The Actin-like MreB 'Cytoskeleton'. In: *Bacillus: Cellular and Molecular*  
737 *Biology (Third edition)*, Graumann P.L. (ed.) pp. 223-262. Caister Academic Press:
- 738 Carlier MF, Pantaloni D (1986) Direct evidence for ADP-Pi-F-actin as the major intermediate in ATP-  
739 actin polymerization. Rate of dissociation of Pi from actin filaments. *Biochemistry* 25: 7789-7792
- 740 Chastanet A, Carballido-Lopez R (2012) The actin-like MreB proteins in *Bacillus subtilis*: a new turn.  
741 *Frontiers in bioscience (Scholar edition)* 4: 1582-1606
- 742 Cooke R, Murdoch L (1973) Interaction of actin with analogs of adenosine triphosphate. *Biochemistry*  
743 12: 3927-3932
- 744 De La Cruz EM, Mandinova A, Steinmetz MO, Stoffler D, Aebi U, Pollard TD (2000) Polymerization and  
745 structure of nucleotide-free actin filaments. *Journal of molecular biology* 295: 517-526
- 746 den Kamp JA, Redai I, van Deenen LL (1969) Phospholipid composition of *Bacillus subtilis*. *Journal of*  
747 *bacteriology* 99: 298-303
- 748 Dersch S, Reimold C, Stoll J, Breddermann H, Heimerl T, Defeu Soufo HJ, Graumann PL (2020)  
749 Polymerization of *Bacillus subtilis* MreB on a lipid membrane reveals lateral co-polymerization of  
750 MreB paralogs and strong effects of cations on filament formation. *BMC Mol Cell Biol* 21: 76

- 751 Dion MF, Kapoor M, Sun Y, Wilson S, Ryan J, Vigouroux A, van Teeffelen S, Oldenbourg R, Garner EC  
752 (2019) *Bacillus subtilis* cell diameter is determined by the opposing actions of two distinct cell wall  
753 synthetic systems. *Nature microbiology* 4: 1294-1305
- 754 Domínguez-Escobar J, Chastanet A, Crevenna AH, Fromion V, Wedlich-Soldner R, Carballido-López R  
755 (2011) Processive movement of MreB-associated cell wall biosynthetic complexes in bacteria. *Science*  
756 (*New York, NY* 333: 225-228
- 757 Emsley P, Lohkamp B, Scott WG, Cowtan K (2010) Features and development of Coot. *Acta*  
758 *Crystallogr D Biol Crystallogr* 66: 486-501
- 759 Esue O, Cordero M, Wirtz D, Tseng Y (2005) The assembly of MreB, a prokaryotic homolog of Actin.  
760 *The Journal of biological chemistry* 280: 2628-2635
- 761 Esue O, Wirtz D, Tseng Y (2006) GTPase activity, structure, and mechanical properties of filaments  
762 assembled from bacterial cytoskeleton protein MreB. *Journal of bacteriology* 188: 968-976
- 763 Frank J, Radermacher M, Penczek P, Zhu J, Li Y, Ladjadj M, Leith A (1996) SPIDER and WEB: processing  
764 and visualization of images in 3D electron microscopy and related fields. *Journal of structural biology*  
765 116: 190-199
- 766 Gaballah A, Kloeckner A, Otten C, Sahl HG, Henrichfreise B (2011) Functional analysis of the  
767 cytoskeleton protein MreB from *Chlamydomonas reinhardtii*. *PloS one* 6: e25129
- 768 Garenne D, Libchaber A, Noireaux V (2020) Membrane molecular crowding enhances MreB  
769 polymerization to shape synthetic cells from spheres to rods. *Proceedings of the National Academy of*  
770 *Sciences of the United States of America* 117: 1902-1909
- 771 Garner EC, Bernard R, Wang W, Zhuang X, Rudner DZ, Mitchison T (2011) Coupled, circumferential  
772 motions of the cell wall synthesis machinery and MreB filaments in *B. subtilis*. *Science (New York, NY*  
773 333: 222-225
- 774 Gibson DG, Young L, Chuang RY, Venter JC, Hutchison CA, 3rd, Smith HO (2009) Enzymatic assembly  
775 of DNA molecules up to several hundred kilobases. *Nature methods* 6: 343-345
- 776 Harne S, Duret S, Pande V, Bapat M, Beven L, Gayathri P (2020) MreB5 Is a Determinant of Rod-to-  
777 Helical Transition in the Cell-Wall-less Bacterium *Spiroplasma*. *Curr Biol* 30: 4753-4762 e4757
- 778 Harris LK, Dye NA, Theriot JA (2014) A *Caulobacter* MreB mutant with irregular cell shape exhibits  
779 compensatory widening to maintain a preferred surface area to volume ratio. *Molecular*  
780 *microbiology*
- 781 Hussain S, Wivagg CN, Szwedziak P, Wong F, Schaefer K, Izore T, Renner LD, Holmes MJ, Sun Y,  
782 Bisson-Filho AW *et al* (2018) MreB filaments align along greatest principal membrane curvature to  
783 orient cell wall synthesis. *eLife* 7
- 784 Iyengar MR, Weber HH (1964) The Relative Affinities of Nucleotides to G-Actin and Their Effects.  
785 *Biochimica et biophysica acta* 86: 543-553
- 786 Jones LJ, Carballido-López R, Errington J (2001) Control of cell shape in bacteria: helical, actin-like  
787 filaments in *Bacillus subtilis*. *Cell* 104: 913-922
- 788 Kabsch W (2010) Xds. *Acta Crystallogr D Biol Crystallogr* 66: 125-132

- 789 Kasai M, Nakano E, Oosawa F (1965) Polymerization of Actin Free from Nucleotides and Divalent  
790 Cations. *Biochimica et biophysica acta* 94: 494-503
- 791 Keller CA, Glasmaster K, Zhdanov VP, Kasemo B (2000) Formation of supported membranes from  
792 vesicles. *Physical Review Letters* 84: 5443-5446
- 793 Kinoshita H, Selden LA, Estes JE, Gershman LC (1993) Nucleotide binding to actin. Cation dependence  
794 of nucleotide dissociation and exchange rates. *The Journal of biological chemistry* 268: 8683-8691
- 795 Kodama T, Fukui K, Kometani K (1986) The initial phosphate burst in ATP hydrolysis by myosin and  
796 subfragment-1 as studied by a modified malachite green method for determination of inorganic  
797 phosphate. *J Biochem* 99: 1465-1472
- 798 Korn ED (1982) Actin polymerization and its regulation by proteins from nonmuscle cells.  
799 *Physiological reviews* 62: 672-737
- 800 Korn ED, Carlier MF, Pantaloni D (1987) Actin polymerization and ATP hydrolysis. *Science (New York,*  
801 *NY* 238: 638-644
- 802 Krissinel E, Henrick K (2004) Secondary-structure matching (SSM), a new tool for fast protein  
803 structure alignment in three dimensions. *Acta Crystallogr D Biol Crystallogr* 60: 2256-2268
- 804 Krissinel E, Henrick K (2007) Inference of macromolecular assemblies from crystalline state. *Journal*  
805 *of molecular biology* 372: 774-797
- 806 Laydevant F, Mahabadi M, Llido P, Bourgoignie JP, Caron L, Arnold AA, Marcotte I, Warschawski DE  
807 (2022) Growth-phase dependence of bacterial membrane lipid profile and labeling for in-cell solid-  
808 state NMR applications. *Biochim Biophys Acta Biomembr* 1864: 183819
- 809 Liebschner D, Afonine PV, Baker ML, Bunkoczi G, Chen VB, Croll TI, Hintze B, Hung LW, Jain S, McCoy  
810 AJ *et al* (2019) Macromolecular structure determination using X-rays, neutrons and electrons: recent  
811 developments in Phenix. *Acta Crystallogr D* 75: 861-877
- 812 Lin L, Thanbichler M (2013) Nucleotide-independent cytoskeletal scaffolds in bacteria. *Cytoskeleton*  
813 *(Hoboken)* 70: 409-423
- 814 Ludtke SJ, Baldwin PR, Chiu W (1999) EMAN: semiautomated software for high-resolution single-  
815 particle reconstructions. *Journal of structural biology* 128: 82-97
- 816 Maeda YT, Nakadai T, Shin J, Uryu K, Noireaux V, Libchaber A (2012) Assembly of MreB filaments on  
817 liposome membranes: a synthetic biology approach. *ACS synthetic biology* 1: 53-59
- 818 Mao W, Daligaux P, Lazar N, Ha-Duong T, Cave C, van Tilbeurgh H, Loiseau PM, Pomel S (2017)  
819 Biochemical analysis of leishmanial and human GDP-Mannose Pyrophosphorylases and selection of  
820 inhibitors as new leads. *Sci Rep* 7: 751
- 821 Mayer JA, Amann KJ (2009) Assembly properties of the *Bacillus subtilis* actin, MreB. *Cell motility and*  
822 *the cytoskeleton* 66: 109-118
- 823 Nickels JD, Chatterjee S, Mostofian B, Stanley CB, Ohl M, Zolnierczuk P, Schulz R, Myles DAA,  
824 Standaert RF, Elkins JG *et al* (2017) *Bacillus subtilis* Lipid Extract, A Branched-Chain Fatty Acid Model  
825 Membrane. *J Phys Chem Lett* 8: 4214-4217
- 826 Nurse P, Mariani KJ (2013) Purification and characterization of *Escherichia coli* MreB protein. *The*  
827 *Journal of biological chemistry* 288: 3469-3475

- 828 Olshausen PV, Defeu Soufo HJ, Wicker K, Heintzmann R, Graumann PL, Rohrbach A (2013)  
829 Superresolution imaging of dynamic MreB filaments in *B. subtilis*--a multiple-motor-driven transport?  
830 *Biophysical journal* 105: 1171-1181
- 831 Oswald F, Varadarajan A, Lill H, Peterman EJ, Bollen YJ (2016) MreB-Dependent Organization of the *E.*  
832 *coli* Cytoplasmic Membrane Controls Membrane Protein Diffusion. *Biophysical journal* 110: 1139-  
833 1149
- 834 Ouzounov N, Nguyen JP, Bratton BP, Jacobowitz D, Gitai Z, Shaevitz JW (2016) MreB Orientation  
835 Correlates with Cell Diameter in *Escherichia coli*. *Biophysical journal* 111: 1035-1043
- 836 Pande V, Mitra N, Bagde SR, Srinivasan R, Gayathri P (2022) Filament organization of the bacterial  
837 actin MreB is dependent on the nucleotide state. *The Journal of cell biology* 221
- 838 Pollard TD (1990) Actin. *Current opinion in cell biology* 2: 33-40
- 839 Pollard TD (2016) Actin and Actin-Binding Proteins. *Cold Spring Harbor perspectives in biology* 8
- 840 Popp D, Narita A, Ghoshdastider U, Maeda K, Maeda Y, Oda T, Fujisawa T, Onishi H, Ito K, Robinson  
841 RC (2010a) Polymeric structures and dynamic properties of the bacterial actin AlfA. *Journal of*  
842 *molecular biology* 397: 1031-1041
- 843 Popp D, Narita A, Maeda K, Fujisawa T, Ghoshdastider U, Iwasa M, Maeda Y, Robinson RC (2010b)  
844 Filament structure, organization, and dynamics in MreB sheets. *The Journal of biological chemistry*  
845 285: 15858-15865
- 846 Renner LD, Eswaramoorthy P, Ramamurthi KS, Weibel DB (2013) Studying Biomolecule Localization  
847 by Engineering Bacterial Cell Wall Curvature. *PloS one* 8
- 848 Renner LD, Weibel DB (2012) MinD and MinE interact with anionic phospholipids and regulate  
849 division plane formation in *Escherichia coli*. *The Journal of biological chemistry* 287: 38835-38844
- 850 Reviakine I, Johannsmann D, Richter RP (2011) Hearing what you cannot see and visualizing what you  
851 hear: interpreting quartz crystal microbalance data from solvated interfaces. *Anal Chem* 83: 8838-  
852 8848
- 853 Robert X, Gouet P (2014) Deciphering key features in protein structures with the new ENDscript  
854 server. *Nucleic acids research* 42: W320-324
- 855 Rodahl M, Hook F, Krozer A, Brzezinski P, Kasemo B (1995) Quartz-Crystal Microbalance Setup for  
856 Frequency and Q-Factor Measurements in Gaseous and Liquid Environments. *Rev Sci Instrum* 66:  
857 3924-3930
- 858 Roeben A, Kofler C, Nagy I, Nickell S, Hartl FU, Bracher A (2006) Crystal structure of an archaeal actin  
859 homolog. *Journal of molecular biology* 358: 145-156
- 860 Salje J, van den Ent F, de Boer P, Lowe J (2011) Direct membrane binding by bacterial actin MreB.  
861 *Molecular cell* 43: 478-487
- 862 Sauerbrey G (1959) Verwendung Von Schwingquarzen Zur Wagung Dunner Schichten Und Zur  
863 Mikrowagung. *Z Phys* 155: 206-222
- 864 Schirner K, Eun YJ, Dion M, Luo Y, Helmann JD, Garner EC, Walker S (2015) Lipid-linked cell wall  
865 precursors regulate membrane association of bacterial actin MreB. *Nature chemical biology* 11: 38-  
866 45

- 867 Schuler H (2001) ATPase activity and conformational changes in the regulation of actin. *Biochimica et*  
868 *biophysica acta* 1549: 137-147
- 869 Seydlova G, Svobodova J (2008) Development of membrane lipids in the surfactin producer *Bacillus*  
870 *subtilis*. *Folia Microbiol (Praha)* 53: 303-307
- 871 Shaevitz JW, Gitai Z (2010) The structure and function of bacterial actin homologs. *Cold Spring Harbor*  
872 *perspectives in biology* 2: a000364
- 873 Sohlenkamp C, Geiger O (2016) Bacterial membrane lipids: diversity in structures and pathways.  
874 *FEMS microbiology reviews* 40: 133-159
- 875 Stoddard PR, Williams TA, Garner E, Baum B (2017) Evolution of polymer formation within the actin  
876 superfamily. *Molecular biology of the cell* 28: 2461-2469
- 877 Vagin A, Teplyakov A (1997) MOLREP: an automated program for molecular replacement. *Journal of*  
878 *Applied Crystallography* 30: 1022-1025
- 879 van den Ent F, Amos LA, Lowe J (2001) Prokaryotic origin of the actin cytoskeleton. *Nature* 413: 39-44
- 880 van den Ent F, Izore T, Bharat TA, Johnson CM, Lowe J (2014) Bacterial actin MreB forms antiparallel  
881 double filaments. *eLife* 3: e02634
- 882 van den Ent F, Johnson CM, Persons L, de Boer P, Lowe J (2010) Bacterial actin MreB assembles in  
883 complex with cell shape protein RodZ. *The EMBO journal* 29: 1081-1090
- 884 van Teeffelen S, Wang S, Furchtgott L, Huang KC, Wingreen NS, Shaevitz JW, Gitai Z (2011) The  
885 bacterial actin MreB rotates, and rotation depends on cell-wall assembly. *Proceedings of the National*  
886 *Academy of Sciences of the United States of America* 108: 15822-15827
- 887 Wong F, Garner EC, Amir A (2019) Mechanics and dynamics of translocating MreB filaments on  
888 curved membranes. *eLife* 8
- 889
- 890
- 891

## 892 **Figure legends**

893

### 894 **Figure 1. Crystal structure of the apo protofilament of MreB from *G. stearothermophilus***

895 **(A)** Crystal structure of apo MreB<sup>Gs</sup> (PDB ID 7ZPT), colored by subdomains, superimposed on that of  
896 apo MreB<sup>Tm</sup> (PDB ID 1JCF), in beige. The sequence similarity between the two proteins is 55.8%.  
897 Subdomain IA (blue) of MreB<sup>Gs</sup> is formed by residues 1-32, 66-145 and 315-347; subdomain IB (yellow)  
898 by residues 33-65; IIA (red) by residues 146-181 and 246-314 and IIB (green) by residues 182-245.  
899 Superimposition of the two forms highlights the distinct positions of loops  $\beta 6$ - $\alpha 2$  and  $\alpha 2$ - $\beta 7$  as well as  
900 the movement of domain IB (two-headed arrow) resulting in slightly distinct subunit interaction modes  
901 as shown in panel C.

902 **(B)** Protofilament structure of apo MreB<sup>Gs</sup>. Three subunits of the protofilament formed upon crystal  
903 packing are displayed as cartoon and colored by subdomains. The subunit repeat distance is indicated.

904 **(C)** Close view of the MreB<sup>Gs</sup> intra-prot filament interface. The two subunits are colored by  
905 subdomains as in panel A, and shown as cartoons. Residues involved in putative salt bridges (gray  
906 dashed lines) are displayed as sticks colored by atom type (N in blue and O in red) and labeled.

907 **(D)** Close view of the MreB<sup>Tm</sup> intra-prot filament interface (PDB ID 1JCF). The two subunits are colored  
908 in beige as in panel A, and shown as cartoons. Residues involved in putative salt bridges (gray dashed  
909 lines) are displayed as sticks colored by atom type (N in blue and O in red) and labeled.

910

### 911 **Figure 2. MreB<sup>Gs</sup> forms double protofilaments in the presence ATP and lipids.**

912 **(A)** Polymerization of MreB<sup>Gs</sup> depends on the presence of lipids and ATP. Negative stained TEM images  
913 of purified MreB<sup>Gs</sup> (0.05 mg/mL) in the presence or absence of 0.5 mg/mL lipid total extract from *E.*  
914 *coli* and of 2 mM ATP. Scale bars, 50 nm.

915 **(B)** Polymer formation as a function of MreB<sup>Gs</sup> concentration. MreB<sup>Gs</sup> was set to polymerize in standard  
916 conditions at a concentration ranging from 0.01 to 0.05 mg/mL. Values are average of two independent  
917 experiments.

918 **(C, D)** MreB<sup>Gs</sup> polymers assemble into sheets (C). Fourier transform (D) was obtained from the area  
919 indicated by a white box in C and revealed a longitudinal subunit repeat of the filaments of 54 Å and a  
920 lateral spacing of 31 Å (arrowheads).

921 **(E)** (*Left*) 2D averaging of images of negatively stained dual protofilaments of MreB<sup>Gs</sup> from 1 554  
922 individual particles. Scale bar, 3 nm. Two copies of the atomic structure of the protofilaments found in



923 the MreB<sup>Gs</sup> crystals shown to scale (*Middle*, for illustration the two protofilaments are displayed in an  
924 antiparallel conformation) and docked into the 2D averaged EM image (*Right*).

925 (F) MreB<sup>Gs</sup> polymers assemble on lipid bilayers and distort liposomes as shown by cryo-electron  
926 microscopy (cryo-EM). Cryo-EM micrographs of liposomes (0.37 mg/mL) made from *E. coli* lipid total  
927 extracts incubated with purified MreB<sup>Gs</sup> (0.05 mg/mL) in the presence of ATP (2 mM). Scale bars, 50  
928 nm.

929 (G). Cryo-EM micrographs showing the cross-section of the membrane of liposomes in the absence  
930 (*Left*) and in the presence (*Right*) of MreB<sup>Gs</sup>. Scale bars, 50 nm.

931

932 **Figure 3. Polymerization of *Geobacillus* MreB depends on the presence of hydrolysable nucleotides.**

933 (A) ATP and GTP promote assembly of MreB<sup>Gs</sup> polymers. Negative stained EM images of purified  
934 MreB<sup>Gs</sup> (0,05 mg/mL) incubated in the presence of either ATP, ADP, AMP, GTP, GDP, the non-  
935 hydrolysable AMP-PNP or ApCpp (2 mM), or in the absence of nucleotide (ctrl) on a lipid monolayer,  
936 for 2 h at room temperature. Scale bars, 50 nm.

937 (B) Formation of MreB<sup>Gs</sup> double filaments on a lipid monolayer depends on ATP hydrolysis. AMP-PNP  
938 competes with ATP for binding to MreB<sup>Gs</sup>, preventing polymerization. MreB<sup>Gs</sup> was set to polymerize in  
939 standard conditions except that 2 mM ATP was replaced by a mix of ATP and AMP-PNP at the indicated  
940 concentrations (in mM). Values are average of three independent experiments.

941 (C) Adsorption of MreB<sup>Gs</sup> to a supported lipid bilayer depends on ATP hydrolysis. Frequency changes  
942 ( $|\Delta f|$ ) in QCM-D experiments measured with varying amount (0.1 - 5  $\mu$ M) of MreB<sup>Gs</sup> on a SLBs made of  
943 DOPC:DOPG 80:20 and in the presence of 2 mM of either ATP, ADP or AMP-PNP.

944

945

946 **Figure 4. The N-terminus and the  $\alpha 2\beta 7$  hydrophobic loop of MreB<sup>Gs</sup> promote membrane binding and**  
947 **polymerization.**

948 (A) Both the hydrophobic  $\alpha 2\beta 7$  loop and the N-terminus sequence of MreB<sup>Gs</sup> are required for efficient  
949 polymerization on a lipid monolayer. Frequency and density of polymer formation observed on  
950 negatively stained TEM images for the wild type (WT) and the mutants of the  $\alpha 2\beta 7$  ( $\Delta$ GLFA), the N-  
951 terminus ( $\Delta$ N<sup>ter</sup>) or both domains ( $\Delta$ N<sup>ter</sup>+  $\Delta$ GLFA) of MreB<sup>Gs</sup>. Images were categorized based on absence  
952 or the presence of low or high density of polymers. Values are the sum of 2 independent experiments.



953 (B) The  $\alpha$ 2- $\beta$ 7 loop and the N-terminus domain of MreB<sup>Gs</sup> enhance its adsorption to supported lipid  
954 bilayers. Frequency change ( $\Delta f$ ) measured for the binding of various concentrations (0.1 - 5  $\mu$ M) of  
955 purified wild-type (WT) and mutant forms of MreB<sup>Gs</sup> to SLBs. Incubations were performed in  
956 polymerization buffer containing 2 mM ATP. SLBs contained an 80:20 molecular ratio of DOPC:DOPG.

957

958 **Figure 5. ATPase activity of MreB<sup>Gs</sup>.**

959 (A) The ATPase activity of MreB<sup>Gs</sup> is stimulated in the presence of lipids. ATPase activity, measured by  
960 monitoring inorganic phosphate (Pi) release, of MreB<sup>Gs</sup> at different concentrations (0.27 – 1.37  $\mu$ M) in  
961 the presence of 0.5 mM ATP and in the presence or absence of 0.05 mg/mL liposomes, after 1 h  
962 incubation at 53°C. Values are averages of at least 2 independent experiments. Error bars are standard  
963 deviations.

964 (B) Kinetics of ATP hydrolysis detected via P<sub>i</sub> release in the presence of 1.37  $\mu$ M MreB<sup>Gs</sup>, 0.5 mM ATP  
965 and 0.05 mg/mL liposomes at 53°C. The line is a simple linear regression fit (goodness of fit R<sup>2</sup> = 0.9910).  
966 Values are averages of 2 independent experiments. Error bars are standard deviations.

967

968 **Figure 6. Model for ATPase-dependent membrane binding and polymerization of MreB<sup>Gs</sup>.** MreB  
969 polymerization follows a hierarchy of events. ATP hydrolysis by monomeric MreB<sup>Gs</sup> (grey) stimulates  
970 MreB<sup>Gs</sup> adsorption to lipids, possibly by promoting a conformational change (orange) that renders the  
971  $\alpha$ 2- $\beta$ 7 loop and N-terminal sequence (red motif) prone for interaction with the membrane MreB<sup>Gs</sup>  
972 monomers competent for lipid interaction, possibly in the ADP-P<sub>i</sub> form, form then membrane-  
973 associated polymers. The absence of polymers in the presence of ATP and absence of lipids supports  
974 a model in which a second conformational change (light yellow) may occur upon binding of MreB  
975 monomers to the membrane, which triggers polymerization.

976

977

## 978 **Supplementary Figure Legends**

979 **Figure S1. Multiple sequence alignment of MreB proteins.** The sequence of from *G.*  
980 *stearothermophilus* (MreB<sup>Gs</sup>) was aligned using Clustal-Ω at PRABI ([https://npsa-prabi.ibcp.fr/cgi-](https://npsa-prabi.ibcp.fr/cgi-bin/npsa_automat.pl?page=/NPSA/npsa_clustalw.html)  
981 [bin/npsa\\_automat.pl?page=/NPSA/npsa\\_clustalw.html](https://npsa-prabi.ibcp.fr/cgi-bin/npsa_automat.pl?page=/NPSA/npsa_clustalw.html)) against the homologous MreB sequences of  
982 the G+ bacterium *B. subtilis* (MreB<sup>Bs</sup>, GenBank ID ATA60829.1) and the G- bacteria *E. coli* (MreB<sup>Ec</sup>,  
983 GenBank ID P\_417717), *C. crescentus* (MreB<sup>Cc</sup>, GenBank ID YP\_002516985.1) and *T. maritima* (MreB<sup>Tm</sup>,  
984 GenBank ID AAD35673.1), respectively. Sequence numbering is relative to MreB<sup>Gs</sup>. Secondary structure  
985 information extracted from the crystal structures of MreB<sup>Gs</sup> (PDB ID 7ZPT), MreB<sup>Cc</sup> (PDB ID 4CZM) and  
986 MreB<sup>Tm</sup> (PDB ID IJCE) are indicated above the sequences using ESPript (Robert & Gouet, 2014). Beta  
987 strands are numbered β1 to β16, alpha helices α1 to α11, and <sub>3</sub><sub>10</sub> helices η1 to η2, according to the  
988 MreB<sup>Gs</sup> structure. α- and β-turns are depicted as TTT and TT, respectively. Blue frames indicate  
989 homologous regions, similar residues are indicated in red and identical residues in white on red  
990 background. The residues of the amino-terminus and α2β7 hydrophobic loops deleted in the mutants  
991 ΔNter and ΔGLFA of MreB<sup>Gs</sup> are highlighted in yellow. Amphipathic helices in MreB<sup>Ec</sup> and MreB<sup>Cc</sup> and  
992 the hydrophobic loop in MreB<sup>Tm</sup> are highlighted in green.

993 **Figure S2. (A)** Typical size exclusion chromatography elution profiles of MreB<sup>Gs</sup>. MreB<sup>Gst</sup> (wild-type)  
994 was loaded on a HiLoad™ 16/600 Superdex™ 200 pg (GE healthcare) size exclusion column immediately  
995 after elution from a Nickel-NTA affinity purification column (plein circles) or after a subsequent 4°C  
996 overnight incubation (empty circles). When size exclusion chromatography was performed using  
997 freshly purified protein from the affinity column, MreB<sup>Gs</sup> (37.36 kDa) eluted mainly as a single peak  
998 corresponding to the monomeric form of the protein according to the calibration of the column. In  
999 contrast, overnight conservation of the eluate before loading onto the Superdex column leads to the  
1000 irreversible formation of high molecular weight assemblies (aggregates) eluting at the dead volume of  
1001 the column. **(B, C)** TEM micrographs of negatively stained samples of MreB<sup>Gs</sup> from the elution fractions  
1002 indicated with an arrow. High molecular weight (=short retention time; B) or monomeric (=long  
1003 retention time; C) MreB<sup>Gs</sup> forms were incubated in conditions supporting polymerization and mounted  
1004 on EM grids for TEM observation. High molecular weight MreB<sup>Gs</sup> forms are aggregates of various sizes  
1005 and shapes independent on the conditions tested (B). Monomeric MreB<sup>Gs</sup> polymerizes into pairs and  
1006 sheets of protofilaments (C).

1007 **Figure S3. MreB<sup>Gs</sup> polymers display a broad range of lengths. (A-D)** Dual protofilaments of MreB<sup>Gs</sup>  
1008 observed on various fields of a single EM grid. Example of fields containing exclusively medium size  
1009 polymers (> 100 nm) (A); exclusively short polymers (< 50 nm) (B); a mix of medium (some bundling)

1010 and short polymers (C), and a mix of long ( $> 1 \mu\text{m}$ ) and short polymers (D). In D, the long polymers are  
1011 extending beyond the edges of the field of view. Scale bars, 50 nm. **(E, F)** MreB<sup>Gs</sup> polymers can form  
1012 filaments extending over several  $\mu\text{m}$ . Scale bars, 500 nm. **(G)** MreB<sup>Gs</sup> polymers can associate laterally  
1013 to form sheets of various widths. Scale bars, 500 nm (black) and 100 nm (white).

1014 **Figure S4. 2D averaging of negatively stained images of MreB<sup>Gs</sup> dual protofilaments showing the**  
1015 **symmetrical arrangement of monomers.** Displayed are the 21 classes of images generated by 2D  
1016 image processing (alignment and classification from 1 554 individual raw image). Scale bar, 20 nm.

1017 **Figure S5. MreB<sup>Gs</sup> polymers coat and distort liposomes.** Cryo-EM micrographs of 0.37 mg/mL  
1018 liposomes made from lipid total extract from *E. coli* alone, shown as negative control **(A)**, or mixed with  
1019 0,05 mg/mL purified MreB<sup>Gs</sup> in the presence of 2mM ATP and incubated for 2h at room temperature  
1020 **(B)**. MreB<sup>Gs</sup> extensively coated the liposomes and deformed them into faceted vesicles. Scale bars, 50  
1021 nm.

1022 **Figure S6. (A)** Size distribution of MreB<sup>Gs</sup> double filaments set to polymerize in the presence of ATP or  
1023 GTP (2mM) in otherwise standard polymerization conditions. Negative stained EM micrographs were  
1024 analyzed under FIJI and the length of filaments  $< 1 \mu\text{m}$  were individually measured. Values are  
1025 distributions of length of at least 800 filaments per condition from 2 independent experiments. Median  
1026 (dashed lines) and quartiles (dotted line) are displayed. The difference between the two conditions are  
1027 significantly different in a nested T-test ( $P\text{-value} = 0.006$ ). **(B)** Quantification of MreB<sup>Gs</sup> polymer  
1028 formation in the presence of high concentrations of nucleotides. MreB<sup>Gs</sup> was set to polymerize in the  
1029 presence of ATP (2 and 25 mM), ADP (2 and 50 mM) or AMP-PNP (2 and 50 mM) in otherwise standard  
1030 polymerization conditions. EM images were acquired on 12 randomly picked position per EM grid,  
1031 spread over the entire grids. Images were categorized based on the sole presence or absence of  
1032 polymers. Values are average of at least two independent experiments. Error bars are standard  
1033 deviations.

1034 **Figure S7. QCM-D experiments of MreB<sup>Gs</sup> adsorption on supported lipid bilayers. (A)** Lipid bilayer  
1035 formation on crystal with SiO<sub>2</sub> layers. Supported lipid bilayers (SLBs) are formed by spontaneous  
1036 rupture of adsorbed liposomes as indicated by frequency shifts ( $\Delta f$ , black solid lines) and dissipation  
1037 shifts ( $\Delta D$ , red dotted lines). Exemplarily shown is the formation of DOPC:DOPG 90:10 SLB from  
1038 DOPC:DOPG 90:10 liposomes. The solid black arrow indicates the addition of liposomes to the SiO<sub>2</sub>  
1039 surface. **(B)** Subsequently, MreB<sup>Gs</sup> wild-type in various concentrations (here 0.1  $\mu\text{M}$ , black line and 1  
1040  $\mu\text{M}$ , grey line) are added to SLBs. The closed and open arrows indicate the start and end of the protein

1041 addition (followed by rinsing with polymerization buffer), respectively. **(C)** MreB<sup>Gs</sup> binds to SLBs of  
1042 different lipid ratios in the presence of ATP but not in the presence of ADP. Error bars are standard  
1043 deviations of n=3. **(D)** High concentrations of ADP and AMP-PNP do not support adsorption of MreB<sup>Gs</sup>  
1044 to SLBs. Frequency changes were measured for the binding of purified MreB<sup>Gs</sup> to SLBs in QCM-D  
1045 experiments. Incubations were performed in polymerization buffer containing 2mM ATP or the  
1046 indicated concentrations of ADP or AMP-PNP. SLBs consisted of DOPC:DOPG 80:20. Values are  
1047 averages of at least two independent experiments. Error bars represent standard deviations of n≥2.  
1048 **(E)** Thickness of the MreB protein layer on the SLBs calculated with the Sauerbrey equation. **(F)** The  
1049 hydrophobic α2-β7 loop and the N-terminus domain of MreB<sup>Gs</sup> enhance adsorption to the SLB, in an  
1050 ATP-dependent manner. Frequency change ( $\Delta f$ ) measured for the binding of various concentrations  
1051 (0.1 - 5 μM) of purified wild-type (WT) and mutant forms of MreB<sup>Gs</sup> to SLBs, assayed by QCM-D.  
1052 Incubations were performed in polymerization buffer containing 2 mM ATP or ADP. SLBs contained an  
1053 80:20 molecular ratio of DOPC:DOPG. Error bars are standard deviations of n=3.

1054 **Figure S8. Distribution of N-terminal amphipathic helix and hydrophobic sequences in the bacterial**  
1055 **kingdom.** N-terminal sequences of MreB proteins from selected species across the bacterial kingdom  
1056 were aligned using Clustal-Ω. The N-terminal sequences were analyzed for the presence of putative α-  
1057 helix (underscore) and/or amphipaticity (green) using the Amphipaseek tool at Prabi ([https://npsa-](https://npsa-prabi.ibcp.fr/)  
1058 [prabi.ibcp.fr/](https://npsa-prabi.ibcp.fr/)), and for the presence of hydrophobic sequences (red). Dark blue columns mark the β-  
1059 sheets 1, 2 and 3 according to MreB<sup>Gs</sup> structure (Fig. S1). The prediction for putative anchoring  
1060 structures is summarized in the right column: A (green), amphipathic helix; H (red), hydrophobic  
1061 sequence; ? (blue), unknown. Species of interest aligned in Fig. S1 are highlighted in yellow. G+ bacteria  
1062 (with low and high GC %) are colored in light blue.

1063 **Figure S9.** Circular dichroism (CD) spectra showing similar folding of the wild-type and the deletion  
1064 mutants of the α2-β7 (ΔGLFA), the N-terminus (ΔN<sup>ter</sup>) or both domains (ΔN<sup>ter</sup> + ΔGLFA) of recombinant  
1065 MreB<sup>Gs</sup>.

1066 **Figure S10. Deletion of the amino-terminal sequence, the GLFA residues of the α2-β7 hydrophobic**  
1067 **loop or both, decrease the quantity of MreB<sup>Gs</sup> polymers on a lipid monolayer.** Because the repartition  
1068 of the polymers on TEM grids are heterogeneous, we acquired for each of two experimental replicas,  
1069 images on 12 random locations widespread on the entire grids. Images were subsequently distributed  
1070 based on the presence of polymers: none, low density, or loan. Here are presented zoomed-in regions  
1071 of the grids with typical examples of each category of images for the wild type MreB<sup>Gs</sup> protein (wt) and  
1072 the three deletion mutants (deleted for the amino-terminus (ΔN<sup>ter</sup>), for the hydrophobic loop (ΔGLFA)

1073 or for both ( $\Delta N^{\text{ter}} + \Delta \text{GLFA}$ ). Grey panels indicate that no images were found for that category. Numbers  
1074 indicate the percentage of observed images (sum of replicates) of each category for each protein. Scale  
1075 bar, 100 nm.

1076 **Figure S11. Crystal structure of MreB<sup>Gs</sup> bound to ATP-Mg.** (A) Comparison of the ATP-Mg-bound form  
1077 with the apo form of MreB<sup>Gs</sup>. One subunit of ATP-bound MreB<sup>Gs</sup> (PDB ID 8AZG), colored by subdomains,  
1078 is superimposed with the apo form of the protein (PDB ID 7ZPT), colored in gray. The bound nucleotide  
1079 is shown as sticks colored by atom type (C in grey, N in blue, O in red and P in orange). The associated  
1080 magnesium ion is shown as a green sphere. Loop  $\beta 6$ - $\alpha 2$ , stabilized by the presence of the bound  
1081 nucleotide, is labeled, as well as loop  $\alpha 2$ - $\beta 7$  and the N-terminus, which display alternative  
1082 conformations. (B) Comparison of the ATP-Mg-bound MreB<sup>Gs</sup> with MreB<sup>Cc</sup> bound to AMP-PNP/Mg.  
1083 Close view of the superimposed nucleotide-binding sites. MreB<sup>Gs</sup> (PDB ID 8AZG) and MreB<sup>Cc</sup> (PDB ID  
1084 4CZJ) are shown as cartoon colored by domain and in beige, respectively. The nucleotide molecules  
1085 are shown as sticks. The bound ATP/Mg is colored by atom type (C in gray, N in blue, O in red, P in  
1086 orange and Mg in green). The bound AMP-PNP/Mg is colored in beige. Two conserved residues (D12  
1087 and N17) involved in the coordination of the Mg<sup>2+</sup> ion in the MreB<sup>Gs</sup> complex are shown as sticks and  
1088 labeled. Two water molecules also involved in Mg<sup>2+</sup> coordination are shown as red spheres. (C) Electron  
1089 density map of ATP-Mg bound to MreB<sup>Gs</sup>. The 2Fo-Fc map contoured at 1.2  $\sigma$  of the nucleotide binding  
1090 site is shown as a gray mesh.

1091 **Figure S12.** (A) The ATPase activity of MreB<sup>Gs</sup> is stimulated at high temperature. Release of P<sub>i</sub> detected  
1092 by malachite green assay for a range of MreB<sup>Gs</sup> concentrations (0.27 – 1.37  $\mu\text{M}$ ) in the presence or  
1093 absence of 0.05 mg/mL liposomes in polymerization buffer (0.5 mM ATP) after 1 h incubation at 53°C  
1094 or 37°C. Error bars are standard deviations of at least two independent measurements. (B) MreB shows  
1095 a similar hydrolytic activity toward GTP and ATP and is stimulated in the presence of lipids. Release of  
1096 P<sub>i</sub> detected by malachite green assay in the presence of ATP or GTP (0.5 mM), after 1 h incubation at  
1097 53°C in the presence or absence of 0.05 mg/mL liposomes for a range of MreB<sup>Gs</sup> concentrations (0.27  
1098 – 1.37  $\mu\text{M}$ ). Error bars are standard deviations of at least two independent measurements.

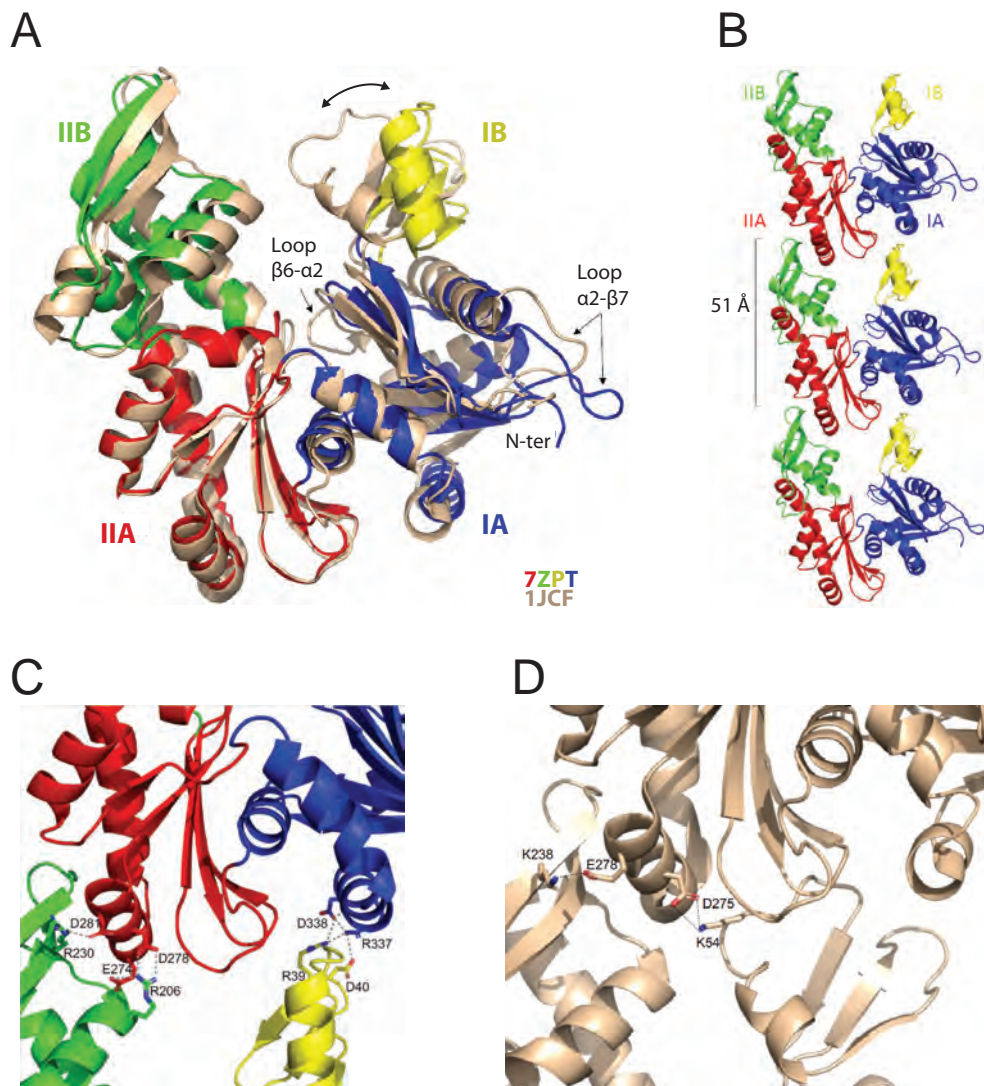



Mao *et al.* Fig. 2

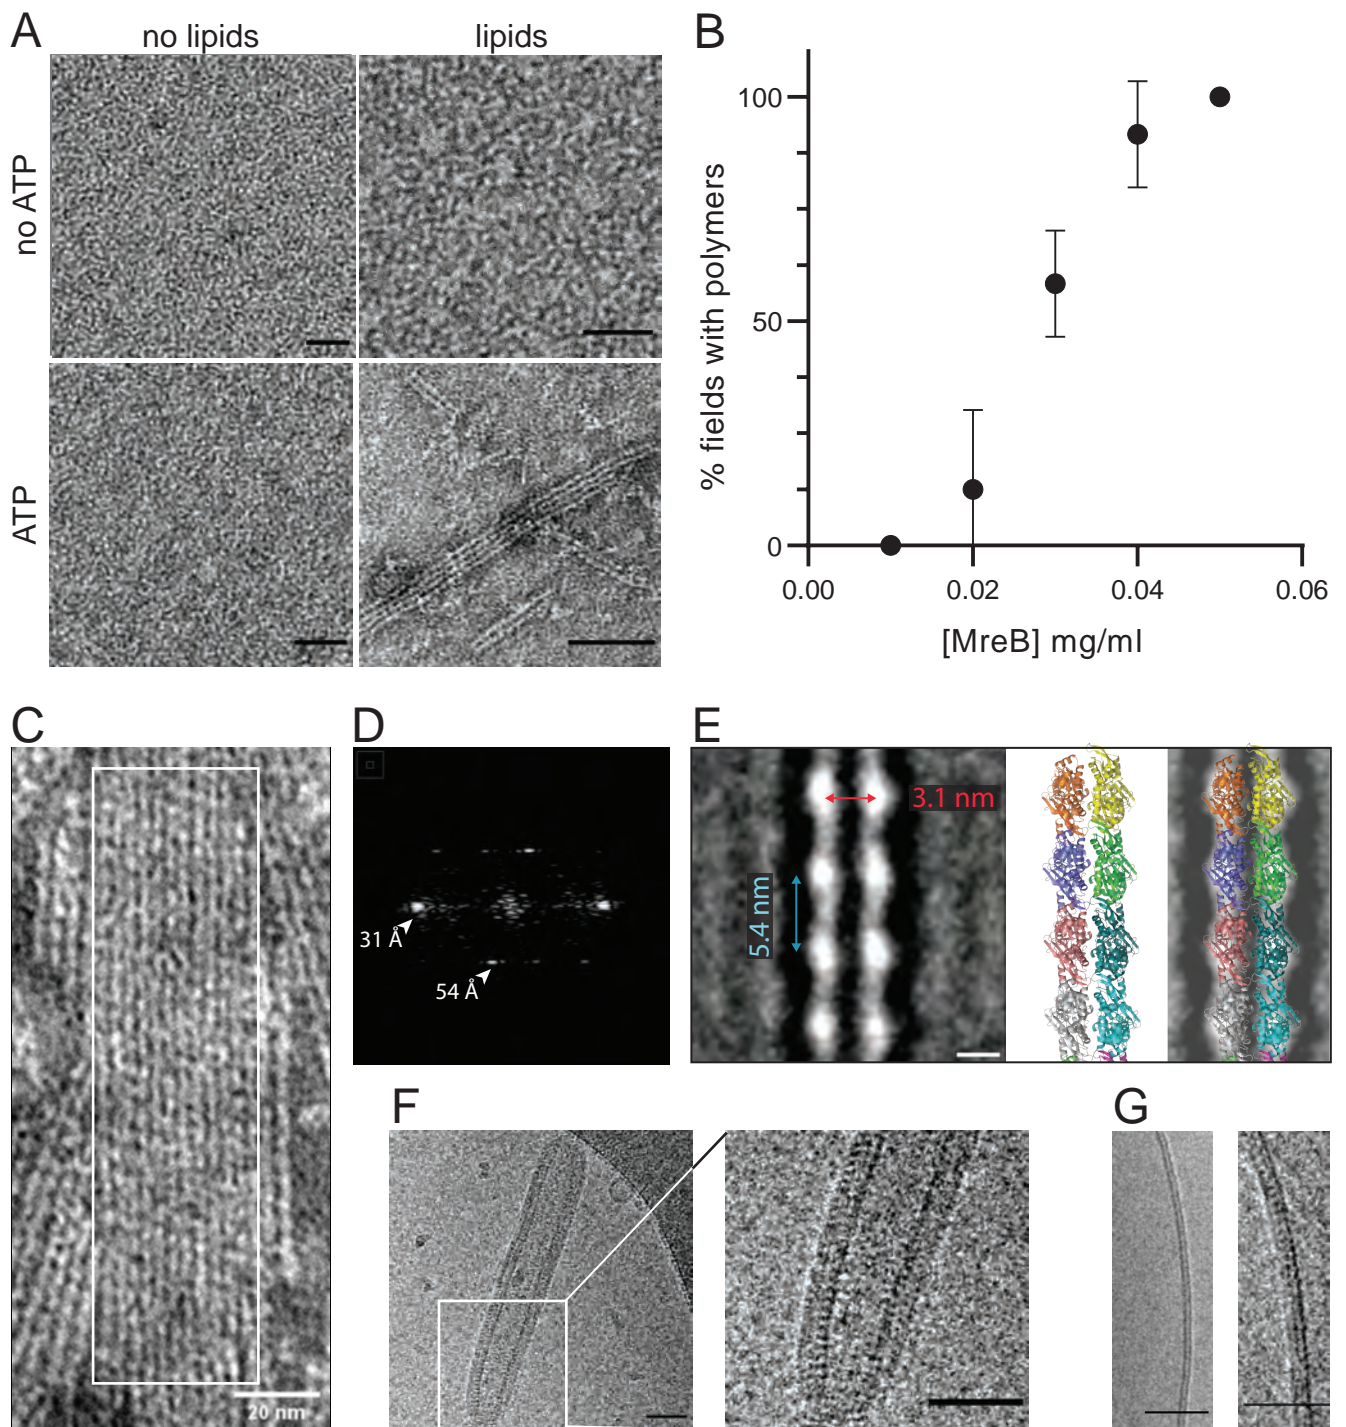



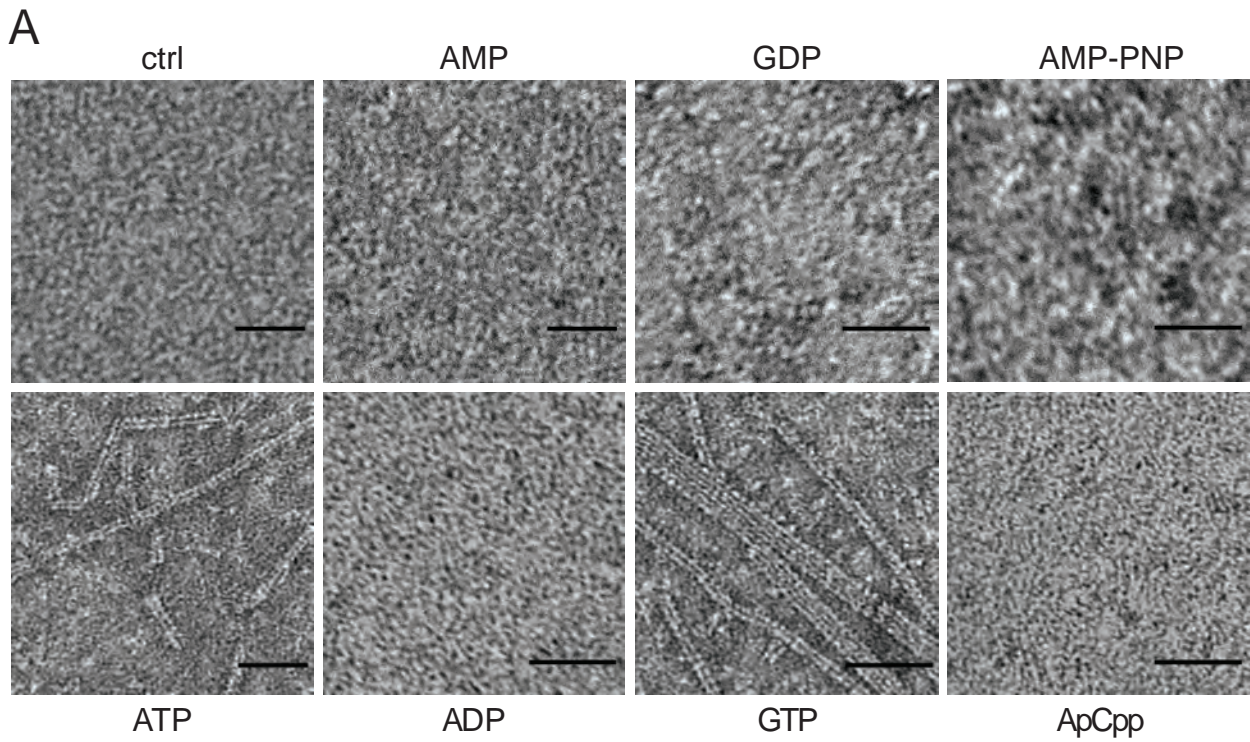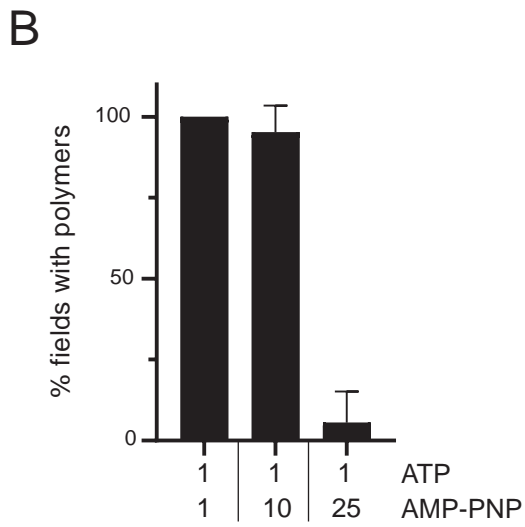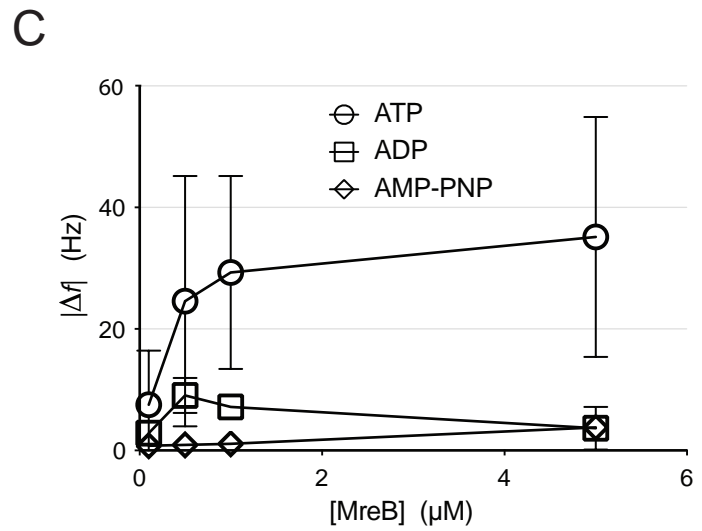

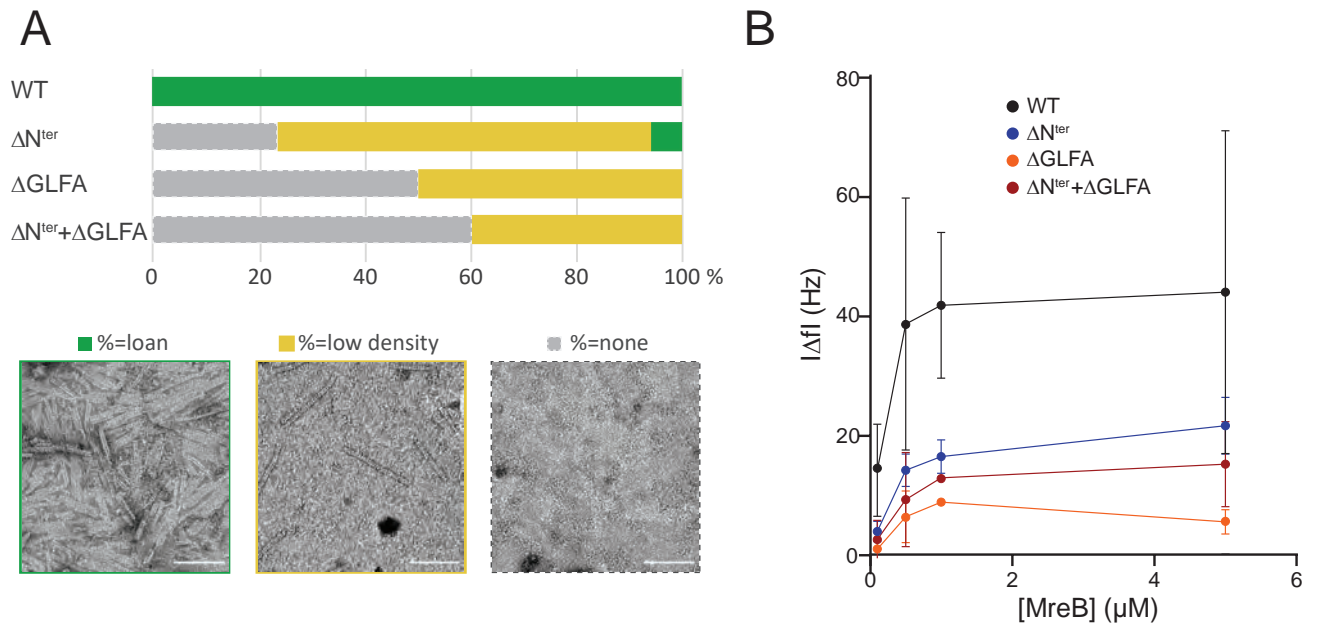

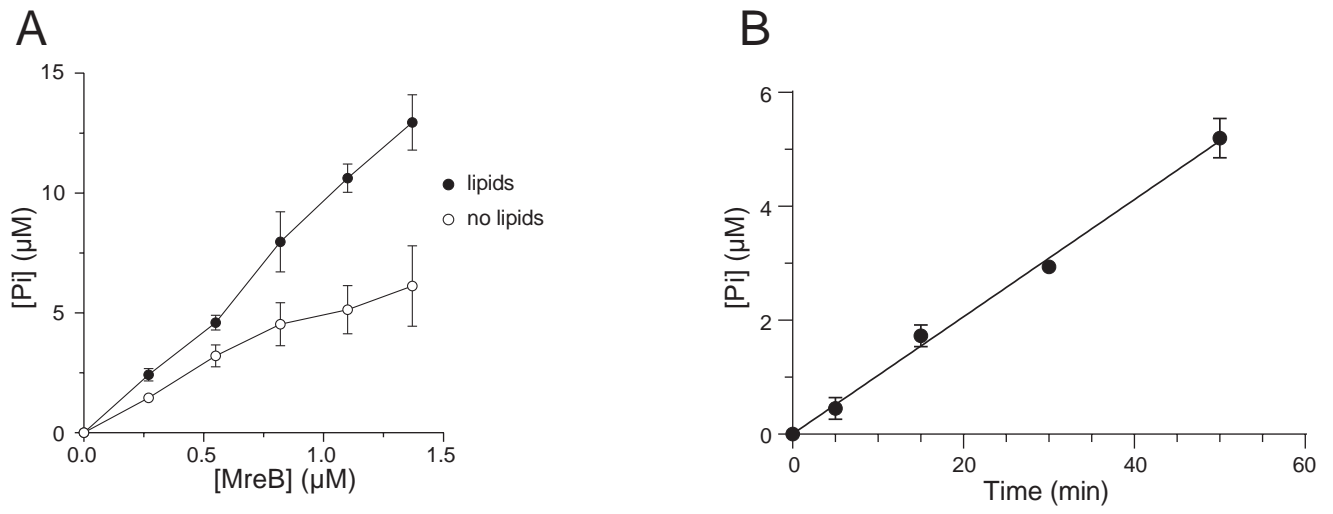

## Mao *et al.* Fig. 6

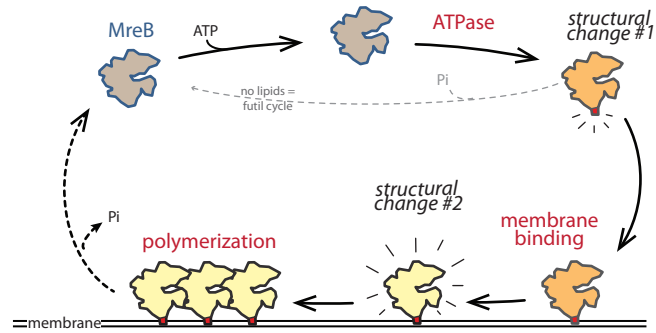

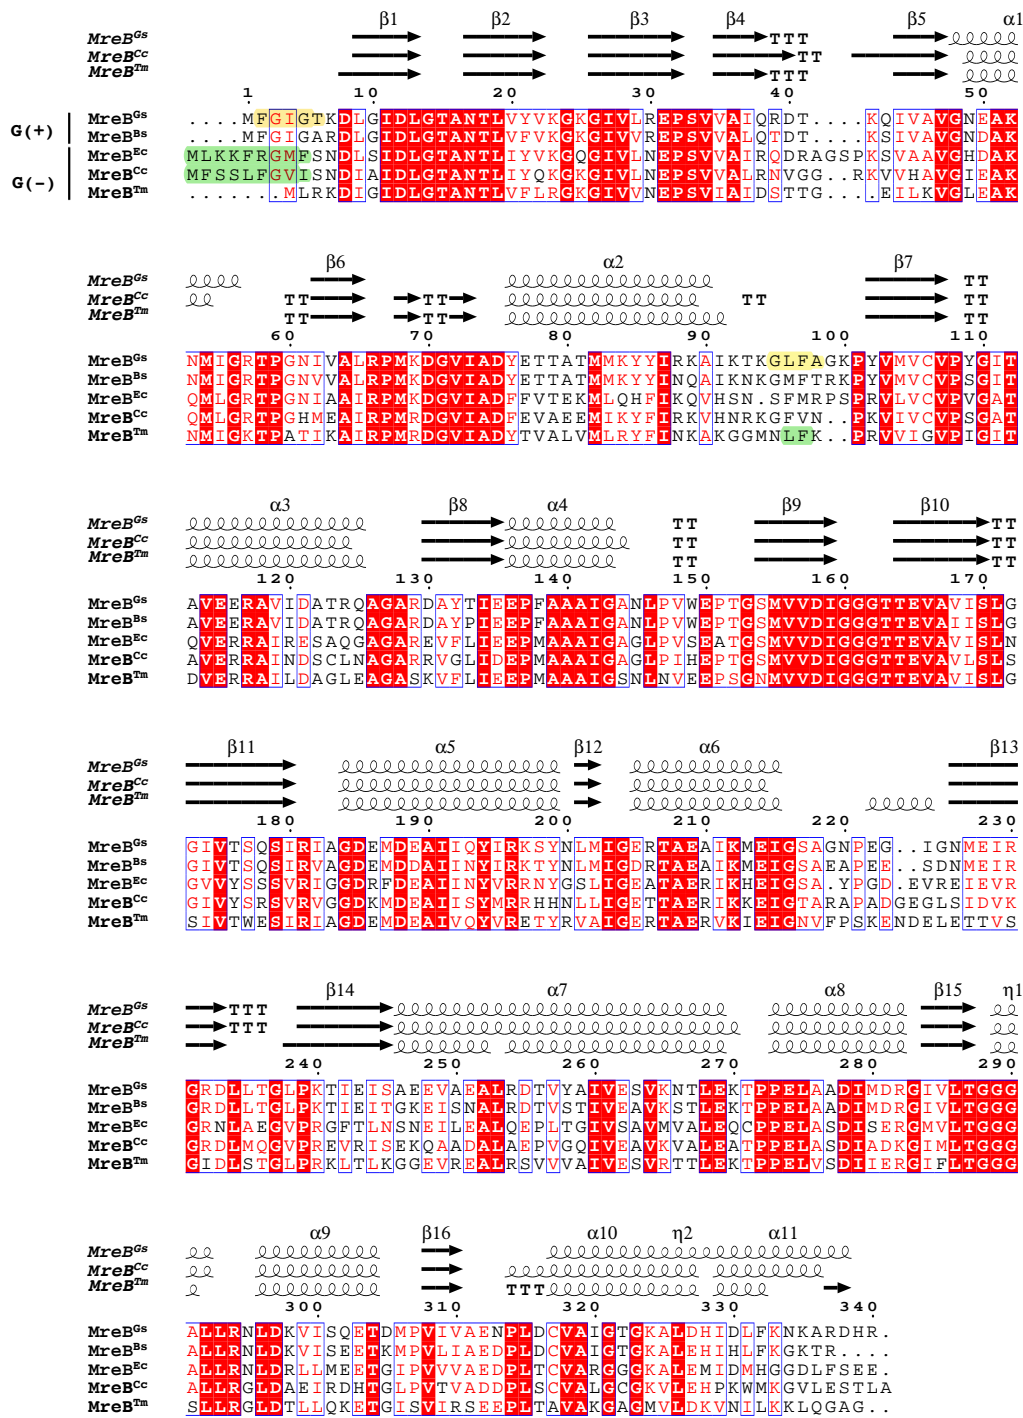

Fig. S2

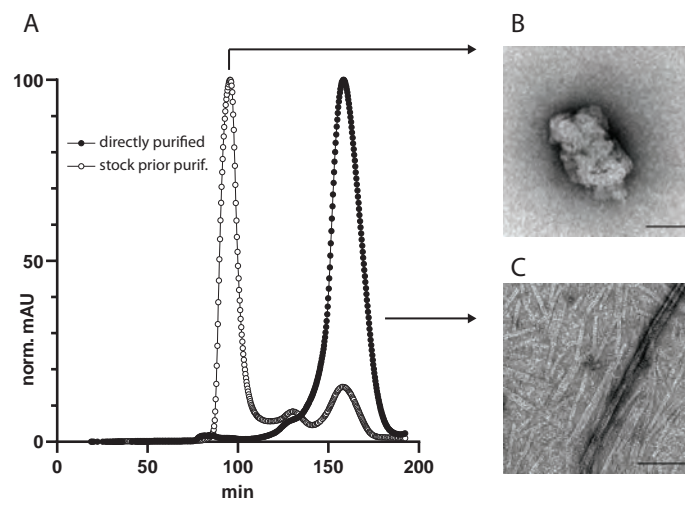



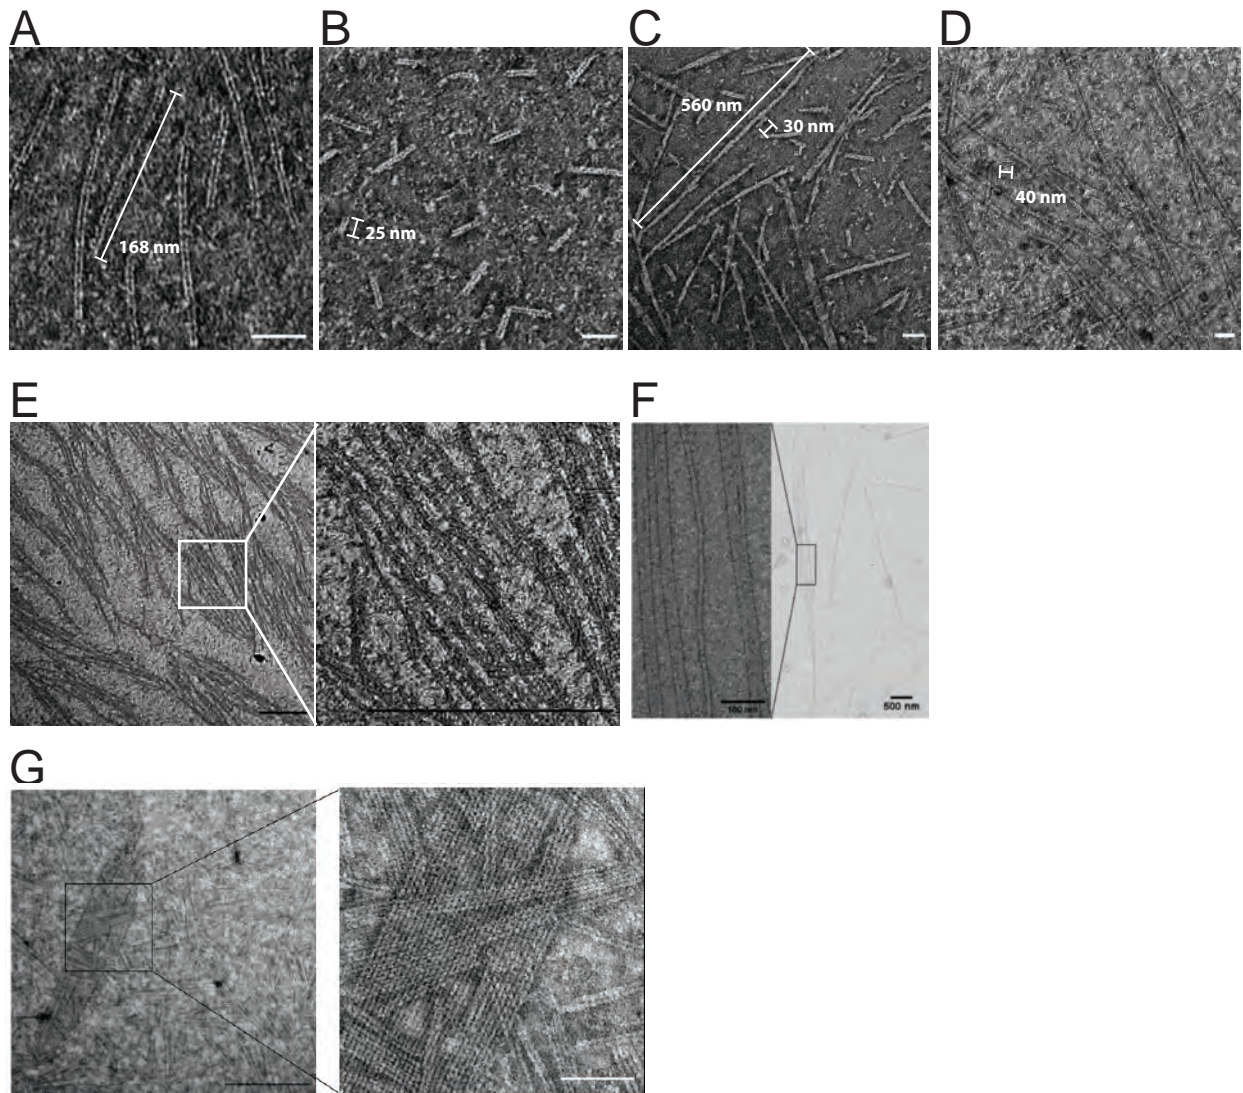

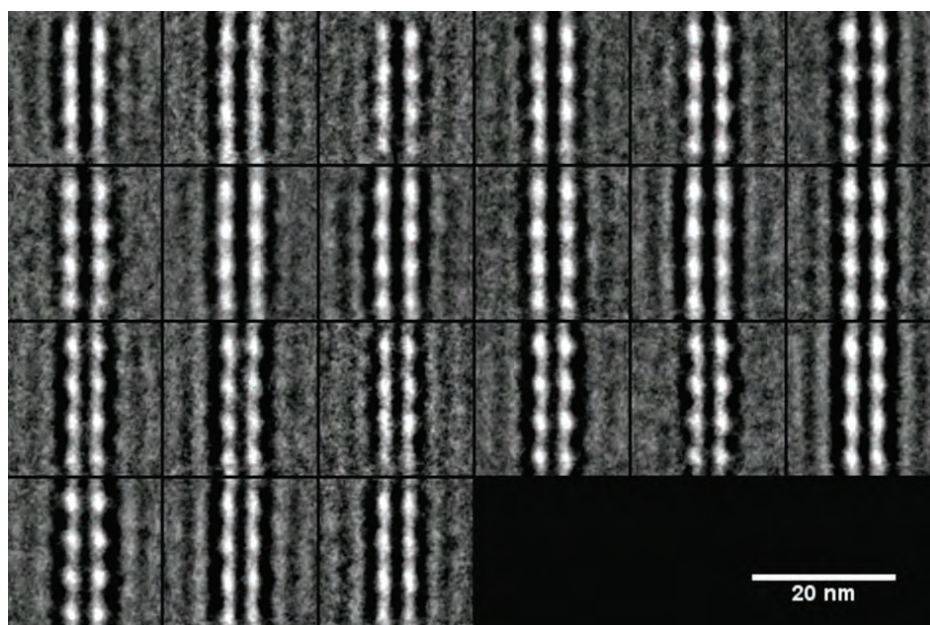

Fig. S5

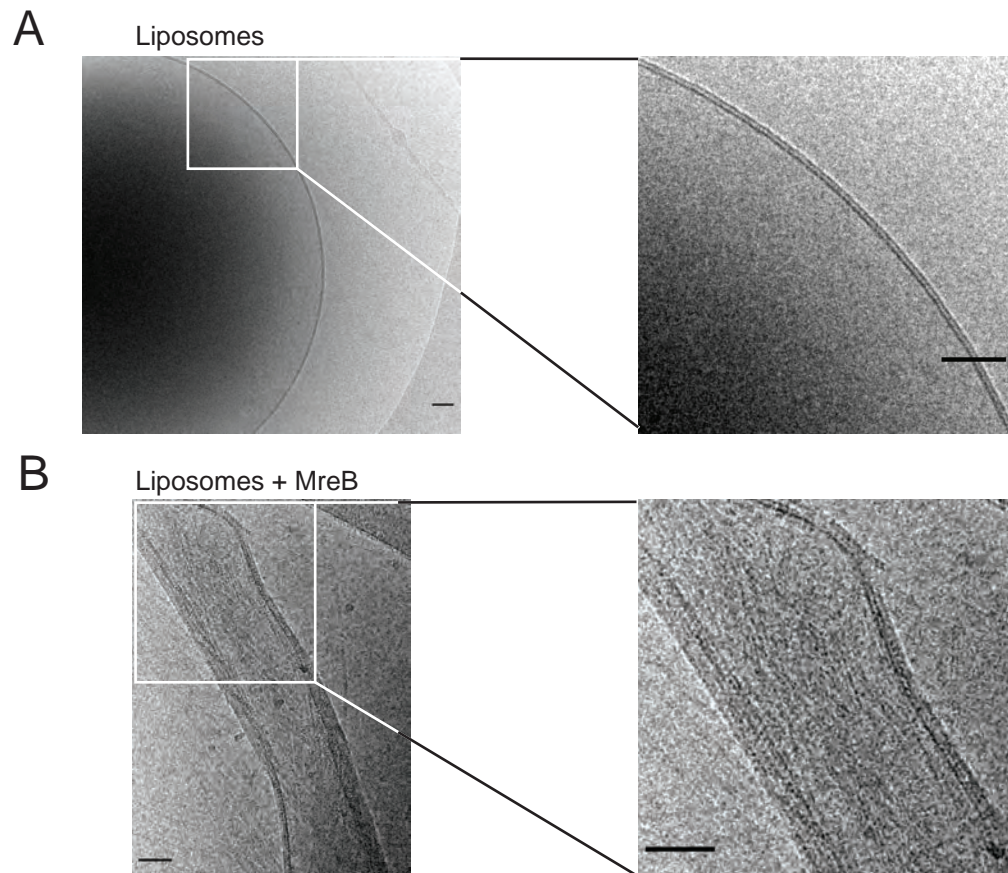

Fig. S6

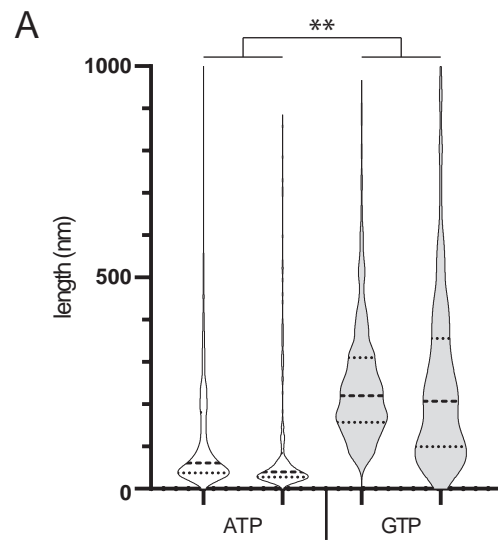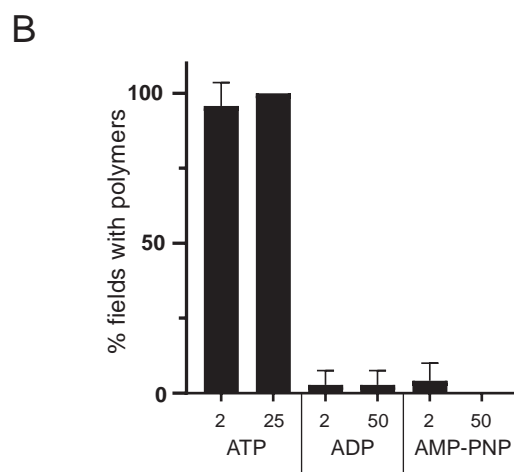

Fig. S7

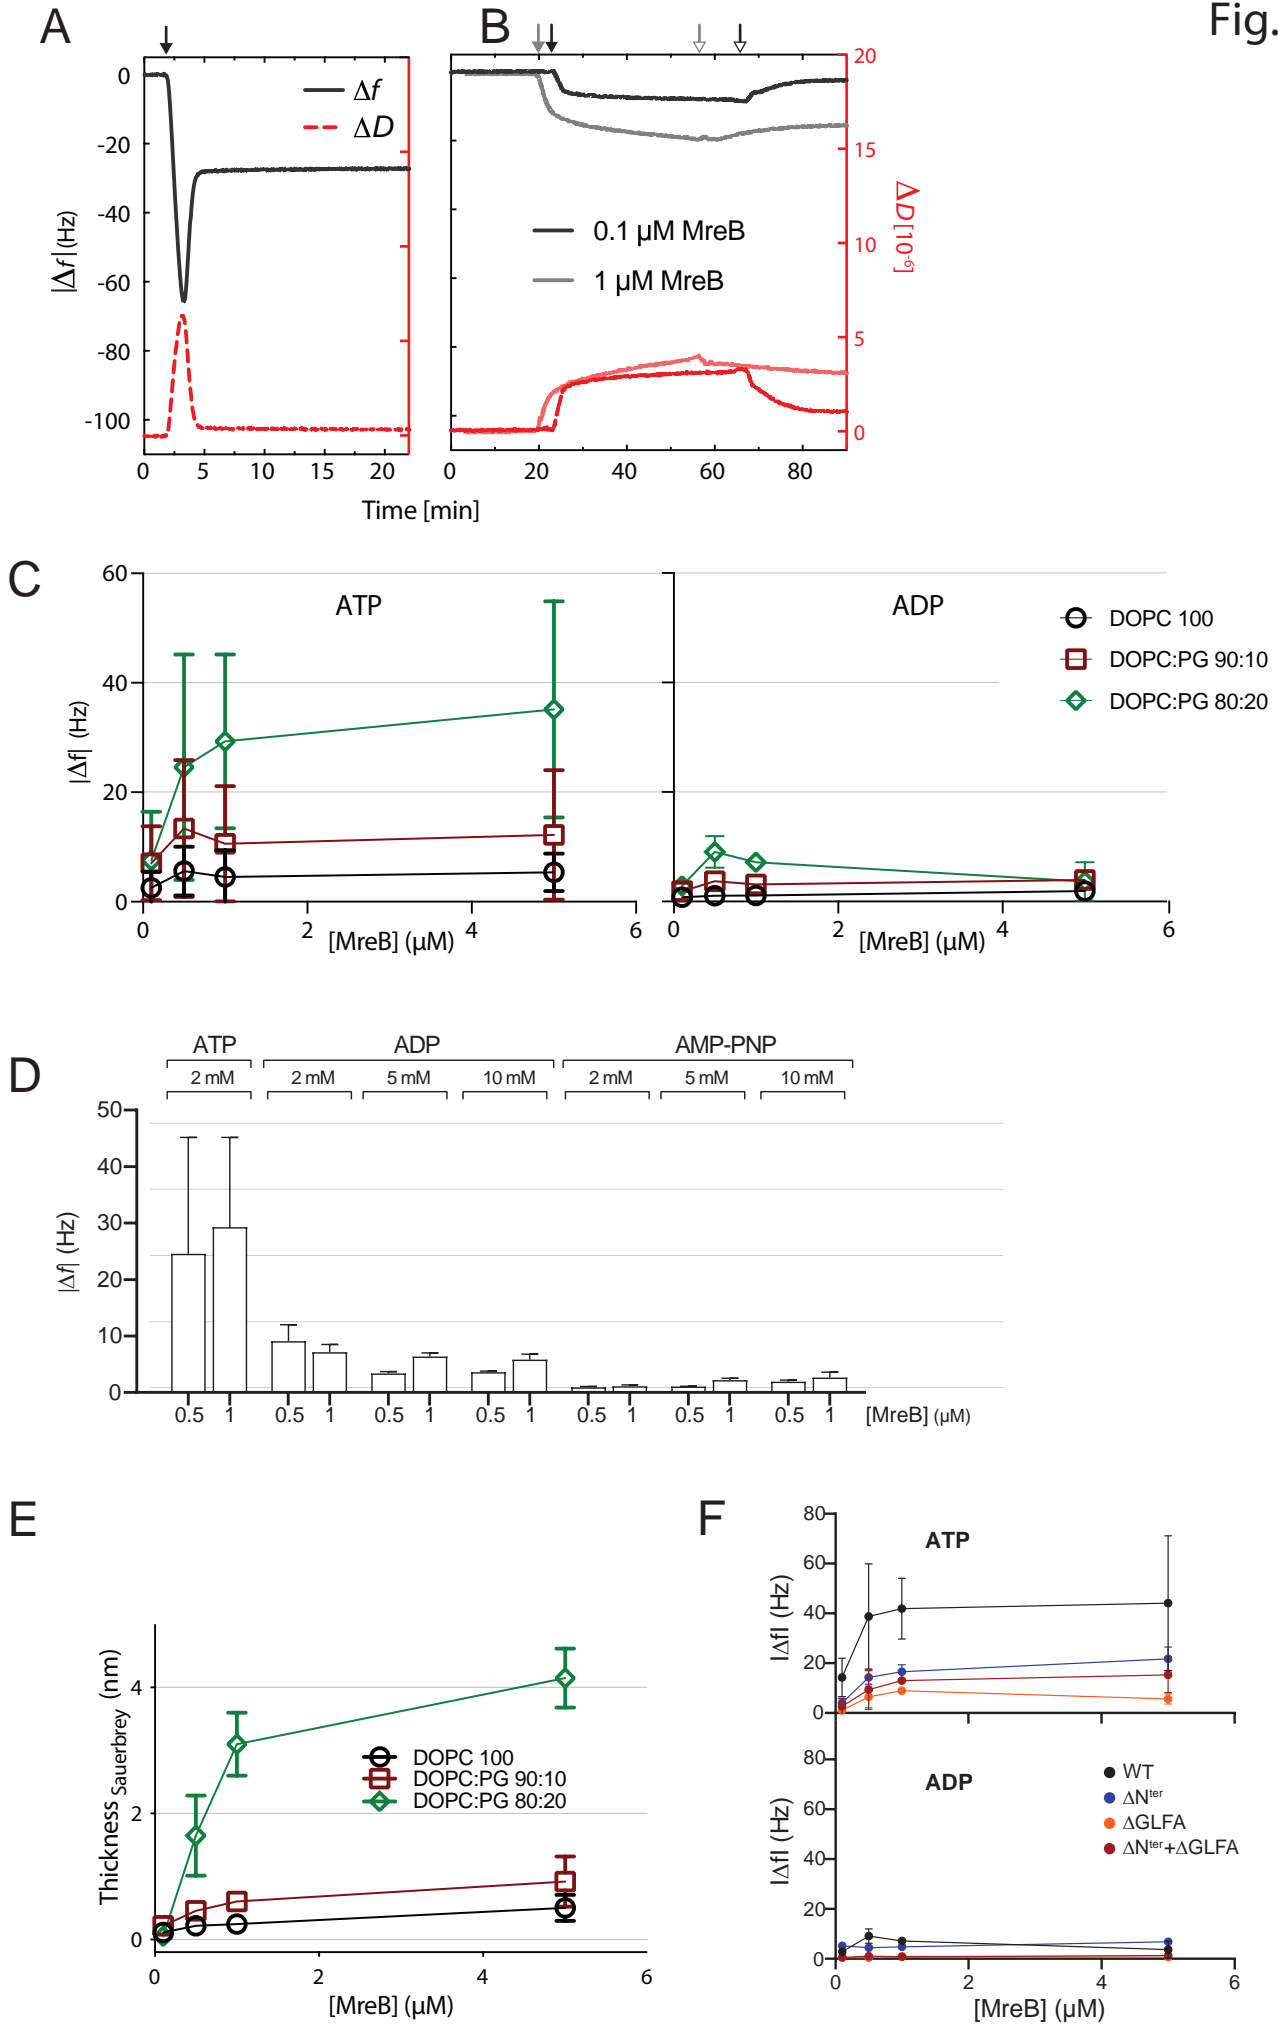



bioRxiv preprint doi: <https://doi.org/10.1101/2022.10.19.512861>; this version posted October 20, 2022. The copyright holder for this preprint (which was not certified by peer review) is the author/funder. All rights reserved. No reuse allowed without permission.

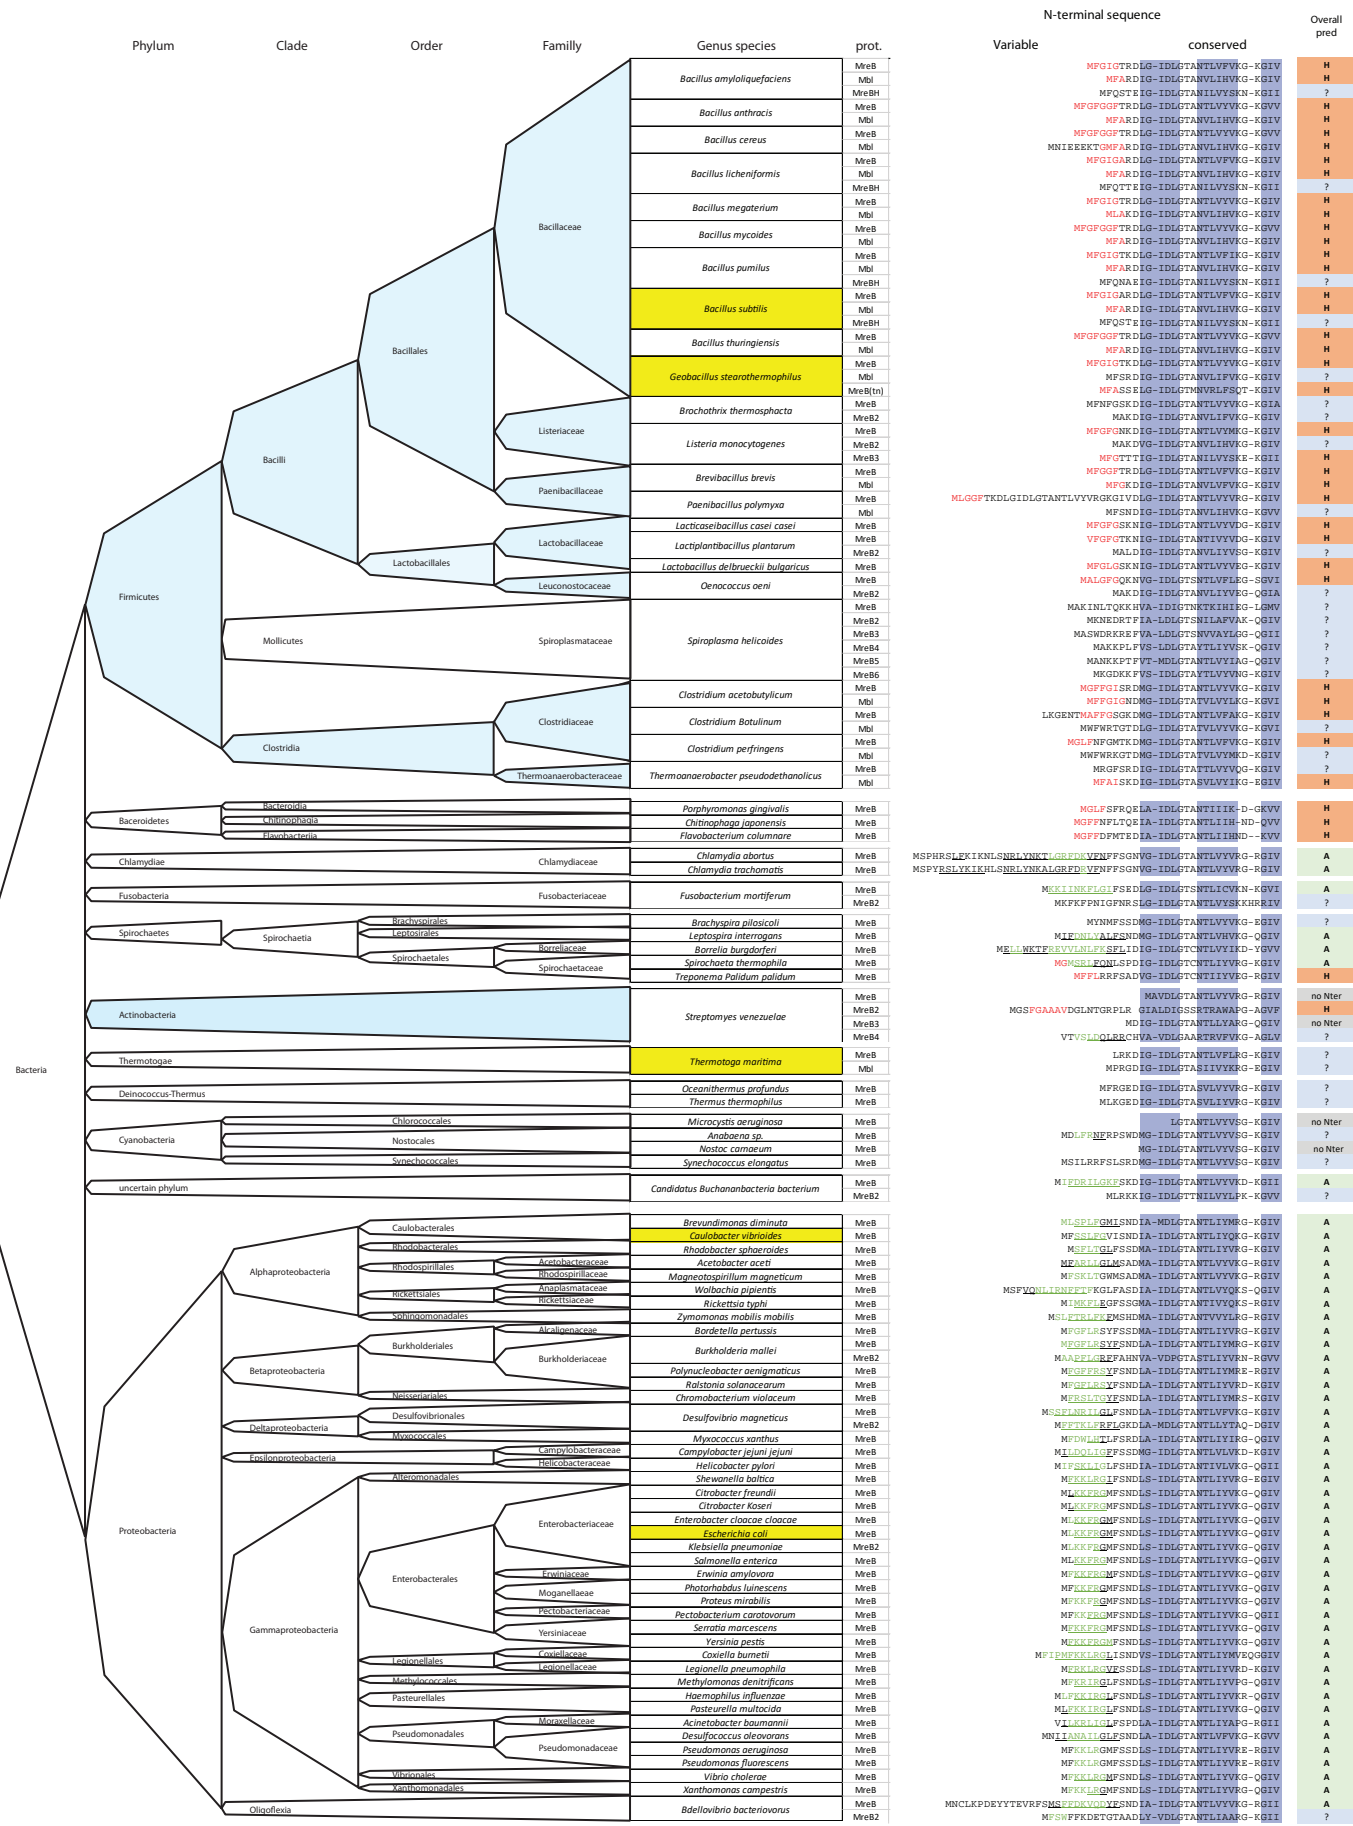



Fig. S9

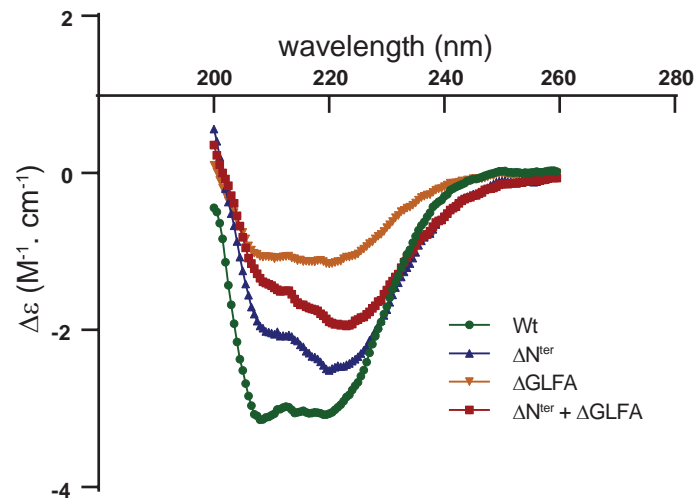

Fig. S10

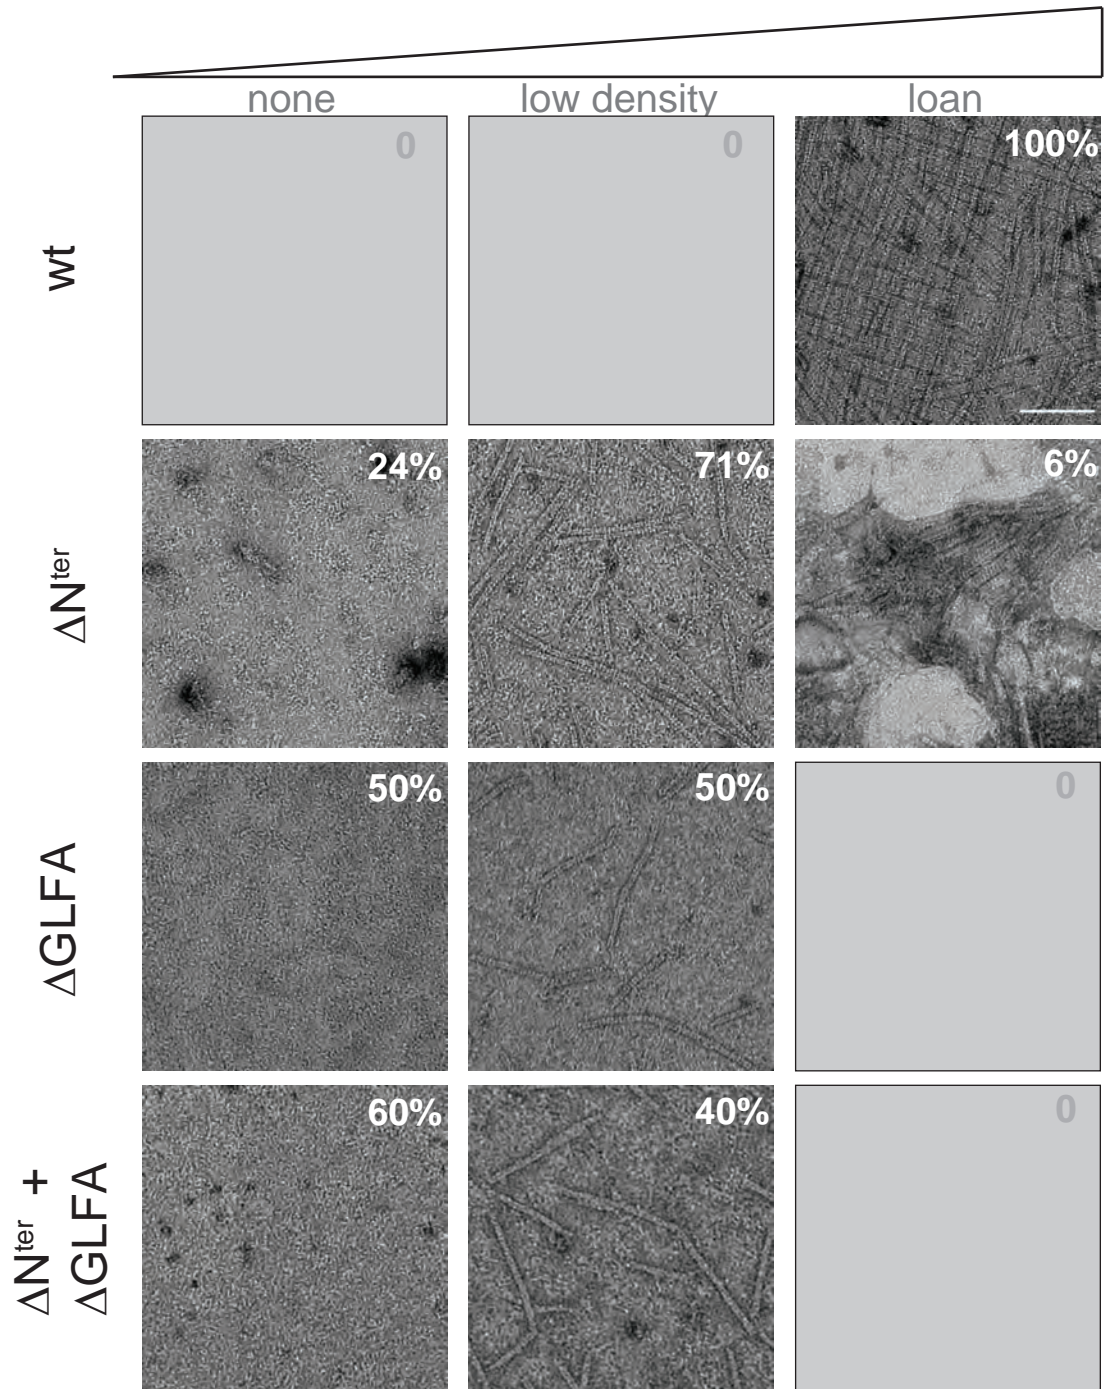

Fig. S11

A

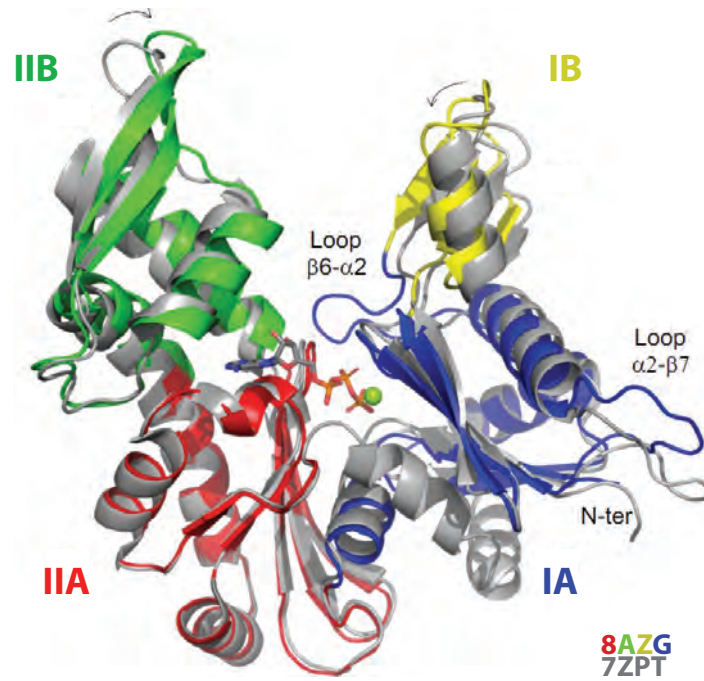

B

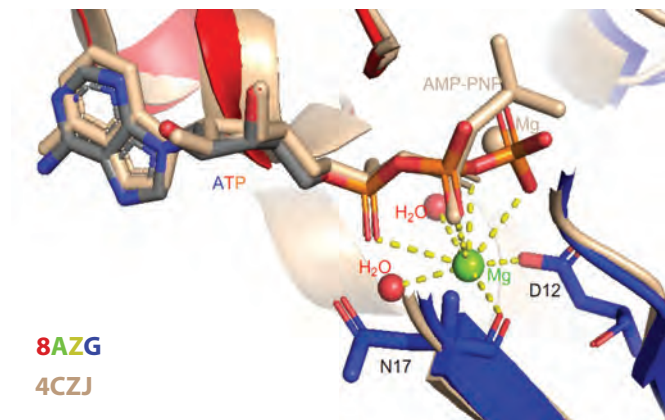

C

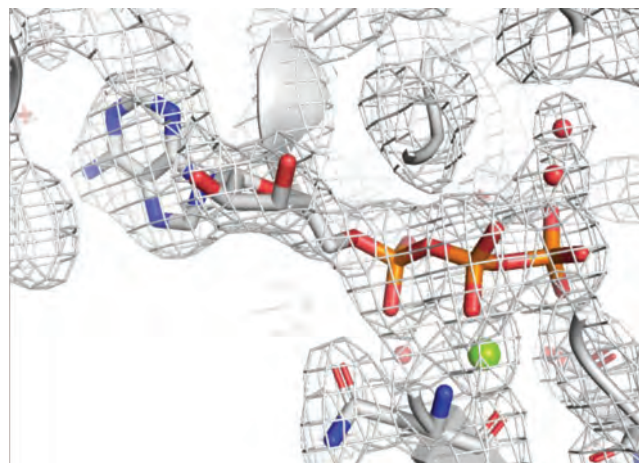

Fig. S12

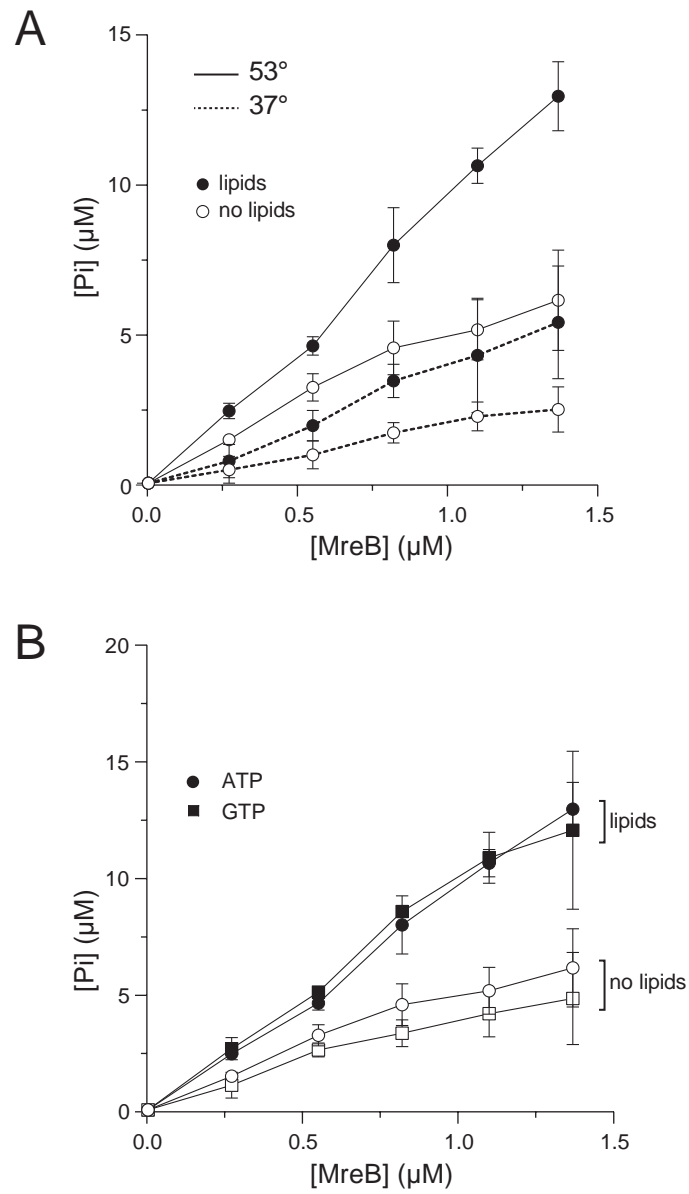

Table S1. Data-collection and refinement statistics

|                                                      | MreB <sup>Gs</sup> (apo) | MreB <sup>Gs</sup> -ATP-Mg <sup>1</sup> |
|------------------------------------------------------|--------------------------|-----------------------------------------|
| <b>Crystallographic data collection</b> <sup>2</sup> |                          |                                         |
| X-ray source                                         | PROXIMA 1 [09-11-2019]   | PROXIMA 1 [09-11-2019]                  |
| Wavelength (Å)                                       | 0.978565                 | 0.978565                                |
| Unit-cell parameters (Å, °)                          | <i>a</i> = 47.19         | <i>a</i> = 57.74                        |
|                                                      | <i>b</i> = 62.01         | <i>b</i> = 169.1                        |
|                                                      | <i>c</i> = 50.92         | <i>c</i> = 43.88                        |
|                                                      | <i>α</i> = <i>γ</i> = 90 | <i>α</i> = <i>β</i> = <i>γ</i> = 90     |
|                                                      | <i>β</i> = 112.98        |                                         |
| Space group                                          | P2 <sub>1</sub>          | P2 <sub>1</sub> 2 <sub>1</sub> 2        |
| Resolution limits (Å)                                | 46.87 – 1.8 (1.9- 1.8)   | 42.47 – 2.29 (2.43-2.29)                |
| Number of observations                               | 173786 (26497)           | 263907 (39495)                          |
| Number of unique reflections                         | 24968 (3960)             | 19996 (3130)                            |
| R-meas (%)                                           | 15.0 (101.8)             | 14,6 (140.7)                            |
| Completeness (%)                                     | 99.5 (98.2)              | 99.7 (98.0)                             |
| I/σ (I)                                              | 7.21 (1.21)              | 12.41 (1.6)                             |
| CC (1/2)                                             | 99.1 (75.9)              | 99.8 (84.3)                             |
| <b>Refinement</b>                                    |                          |                                         |
| Number of non-hydrogen atoms (Protein/other/water)   | 2497/16/127              | 2450/57/79                              |
| R/R <sub>free</sub> (%)                              | 19.1/23.4                | 24.7/24.8                               |
| R.M.S.D. Bonds (Å)/angles (°)                        | 0.008/0.96               | 0.007/0.898                             |
| Average temperature factors (Protein/other/water)    | 32.8/36.8/37.1           | 58.9/60.8/57.1                          |
| Ramachandran plot (%) (favored/outliers)             | 98/0                     | 98/1                                    |
| PDB code                                             | <b>7ZPT</b>              | <b>8AZG</b>                             |

<sup>1</sup> co-crystal

<sup>2</sup> Values in parentheses refer to the highest resolution shell

Table S2. List of polymerization condition assayed

| Variable    | Variation to standard polymerization condition <sup>1</sup> |         | Polymer formation <sup>2</sup> |
|-------------|-------------------------------------------------------------|---------|--------------------------------|
| -           | -                                                           |         | +                              |
| [MreB]      | 0,1 mg/ml                                                   |         | +                              |
|             | 0,04 mg/ml                                                  |         | +                              |
|             | 0,03 mg/ml                                                  |         | +/-                            |
|             | 0,02 mg/ml                                                  |         | +/-                            |
|             | 0,01mg/ml                                                   |         | -                              |
| mutation    | $\Delta N^{ter}$                                            |         | +/-                            |
|             | $\Delta GLFA$                                               |         | +/-                            |
|             | $\Delta GLFA + \Delta N^{ter}$                              |         | +/-                            |
| Lipids      | absence                                                     |         | -                              |
| Nucleotides | GTP                                                         | 2 mM    | +                              |
|             | GDP                                                         | 2 mM    | -                              |
|             | ADP                                                         | 2 mM    | -                              |
|             | "                                                           | 50 mM   | -                              |
|             | AMP                                                         | 2 mM    | -                              |
|             | ApCpp                                                       | 2 mM    | -                              |
|             | AMP-PNP                                                     | 2 mM    | -                              |
|             | "                                                           | 50 mM   | -                              |
|             | ATP/AMP-PNP                                                 | 1/1 mM  | +                              |
|             | "                                                           | 1/10 mM | +                              |
|             | "                                                           | 1/25 mM | -                              |
|             | ATP                                                         | 25 mM   | +                              |
|             | "                                                           | 0,8 mM  | +                              |
|             | "                                                           | 0,5 mM  | +                              |
|             | "                                                           | 0,2 mM  | +                              |
| Incubation  | overnight                                                   |         | +                              |
|             | 1h                                                          |         | +                              |

<sup>1</sup> standard polymerization conditions are:

2 mM ATP, 0,5 mg/ml lipids, 0,05 mg/ml MreB, in Tris - KCl - MgCl<sub>2</sub> pH7 buffer, 25°C, for 2-3h

<sup>2</sup> (-) no polymers, (+) polymers, (+/-) lower density of polymer per field and empty fields



Table S3. Proteins used in this study

| name                    | MreB <sup>Gs</sup> *                                                                              | expression vector |
|-------------------------|---------------------------------------------------------------------------------------------------|-------------------|
| WT                      | MHHHHHH M <sup>1</sup> FGIGTKDLGI <sup>11</sup> (...) K <sup>94</sup> GLFAGK <sup>100</sup> (...) | pCC110            |
| $\Delta N^{\text{ter}}$ | MHHHHHH M <sup>1</sup> DLGI <sup>11</sup> (...) K <sup>94</sup> GLFAGK <sup>100</sup> (...)       | pCC116            |
| $\Delta \text{GLFA}$    | MHHHHHH M <sup>1</sup> FGIGTKDLGI <sup>11</sup> (...) K <sup>94</sup> GK <sup>100</sup> (...)     | pCC117            |
| $\Delta N^{\text{ter}}$ | MHHHHHH M <sup>1</sup> DLGI <sup>11</sup> (...) K <sup>94</sup> GK <sup>100</sup> (...)           | pCC115            |

\*numbering of aminoacids refers to *MreB*<sup>Gs</sup> wt sequence

Table S4. Strains used in this study

| Strain                       | Relevant genotype                                                                                                                       | information                                                                                                                                         | Source or reference <sup>1</sup> |
|------------------------------|-----------------------------------------------------------------------------------------------------------------------------------------|-----------------------------------------------------------------------------------------------------------------------------------------------------|----------------------------------|
| <i>G. stearothermophilus</i> |                                                                                                                                         |                                                                                                                                                     |                                  |
| ATCC 7953                    | wild type isolate                                                                                                                       |                                                                                                                                                     | BGSC (Ref. W9A12)                |
| <i>E. coli</i>               |                                                                                                                                         |                                                                                                                                                     |                                  |
| T7 express                   | <i>F-λ-fhuA2 [lon] ompT lacZ::T7 gene1 gal sulA11 Δ(mcrC-mrr)114::IS10 R(mcr-73::miniTn10-TetS)2 R(zgb-210::Tn10)(TetS) endA1 [dcm]</i> | expression strain carrying the T7 RNA polymerase gene into the <i>lac</i> operon, allowing controlled IPTG-induced expression of a gene of interest | New England Biolabs              |
| EcRCL2                       | pET28a                                                                                                                                  | replicative plasmid pET28a(+) (Novagen) allowing IPTG-induction of a gene of interest; in DH10b                                                     | lab collection                   |
| EcRCL212                     | pCC110::( <i>mreB</i> <sup>Gs</sup> )                                                                                                   | pET28a(+) derivative carrying a wild type copy of <i>mreB</i> <sup>Gs</sup> under control of the T7 promoter                                        | pCC110 → T7 express              |
| EcRCL243                     | pCC115::( <i>mreB</i> <sup>Gs</sup> δ 2->7;δGLFA)                                                                                       | pCC110 derivative carrying a copy of <i>mreB</i> <sup>Gs</sup> deleted for codons 2-7 (FGIGTK) and 102-105 (GLFA)                                   | pCC115 → T7 express              |
| EcRCL244                     | pCC116::( <i>mreB</i> <sup>Gs</sup> δ 2->7)                                                                                             | pCC110 derivative carrying a copy of <i>mreB</i> <sup>Gs</sup> deleted for codons 2-7 (FGIGTK)                                                      | pCC116 → T7 express              |
| EcRCL245                     | pCC117::( <i>mreB</i> <sup>Gs</sup> δGLFA)                                                                                              | pCC110 derivative carrying a copy of <i>mreB</i> <sup>Gs</sup> deleted for codons 102-105 (GLFA)                                                    | pCC117 → T7 express              |

<sup>1</sup>: Arrows indicate construction by transformation with chromosomal or plasmidic DNA

Table S5. Oligonucleotides used in this study

| name  | sequence                                       | use                            |
|-------|------------------------------------------------|--------------------------------|
| cc430 | CCATGCATCATCACCATCATCACATGTTTGGGATTGGAACGAAAGA | construction of pCC110         |
| cc431 | CGGAGCTCGAATTCGGATCCTCAGCGATGGTCTCTGCCTT       | "                              |
| cc432 | TCTTTCGTTCCAATCCCAAACATGTGATGATGGTGATGATGCATGG | "                              |
| cc433 | AAGGCGAGAGACCATCGCTGAGGATCCGAATTCGAGCTCCG      | "                              |
| cc582 | CATCACCATCATCACATGGATCTTGGGATCGATTTAGGGAC      | construction of pCC116, pCC115 |
| cc583 | CCAAGATCCATGTGATGATGGTGATGATGCAT               | "                              |
| cc584 | CAAGACGAAGGGCAAGCCGTATGTGATGG                  | construction of pCC117, pCC115 |
| cc585 | ACGGCTTGCCCTTCGTCTTGATGGCTTTGCGAAT             | "                              |
